# Supplementary material for: Does exercise impact gut microbiota composition in men receiving androgen deprivation therapy for prostate cancer? A single-blinded, two-armed, randomised controlled trial
Source: PubMed Central journal article supplement — BMJ Open. 2019 Apr 14;9(4):e024872. doi: 10.1136/bmjopen-2018-024872 (PMC6500366; doi:10.1136/bmjopen-2018-024872), 2019-04-14
Supplement: bmjopen-2018-024872.draft_revisions.pdf [file bmjopen-2018-024872.draft_revisions.pdf]

# BMJ Open

BMJ Open is committed to open peer review. As part of this commitment we make the peer review history of every article we publish publicly available.

When an article is published we post the peer reviewers' comments and the authors' responses online. We also post the versions of the paper that were used during peer review. These are the versions that the peer review comments apply to.

The versions of the paper that follow are the versions that were submitted during the peer review process. They are not the versions of record or the final published versions. They should not be cited or distributed as the published version of this manuscript.

BMJ Open is an open access journal and the full, final, typeset and author-corrected version of record of the manuscript is available on our site with no access controls, subscription charges or pay-per-view fees (<http://bmjopen.bmj.com>).

If you have any questions on BMJ Open's open peer review process please email [editorial.bmjopen@bmj.com](mailto:editorial.bmjopen@bmj.com)

# BMJ Open

## Does exercise impact gut microbiota composition of men receiving androgen deprivation therapy for prostate cancer? An exploratory study protocol.

|                               |                                                                                                                                                                                                                                                                                                                                                                                                                                                                                                                                                                                                                                                                                                                                                                                                                                                                                                                                                                                                                                                                                                                                                                                                                                                                                                                                                                                                                                                                                                                                                                                                                                                             |
|-------------------------------|-------------------------------------------------------------------------------------------------------------------------------------------------------------------------------------------------------------------------------------------------------------------------------------------------------------------------------------------------------------------------------------------------------------------------------------------------------------------------------------------------------------------------------------------------------------------------------------------------------------------------------------------------------------------------------------------------------------------------------------------------------------------------------------------------------------------------------------------------------------------------------------------------------------------------------------------------------------------------------------------------------------------------------------------------------------------------------------------------------------------------------------------------------------------------------------------------------------------------------------------------------------------------------------------------------------------------------------------------------------------------------------------------------------------------------------------------------------------------------------------------------------------------------------------------------------------------------------------------------------------------------------------------------------|
| Journal:                      | <i>BMJ Open</i>                                                                                                                                                                                                                                                                                                                                                                                                                                                                                                                                                                                                                                                                                                                                                                                                                                                                                                                                                                                                                                                                                                                                                                                                                                                                                                                                                                                                                                                                                                                                                                                                                                             |
| Manuscript ID                 | bmjopen-2018-024872                                                                                                                                                                                                                                                                                                                                                                                                                                                                                                                                                                                                                                                                                                                                                                                                                                                                                                                                                                                                                                                                                                                                                                                                                                                                                                                                                                                                                                                                                                                                                                                                                                         |
| Article Type:                 | Protocol                                                                                                                                                                                                                                                                                                                                                                                                                                                                                                                                                                                                                                                                                                                                                                                                                                                                                                                                                                                                                                                                                                                                                                                                                                                                                                                                                                                                                                                                                                                                                                                                                                                    |
| Date Submitted by the Author: | 19-Jun-2018                                                                                                                                                                                                                                                                                                                                                                                                                                                                                                                                                                                                                                                                                                                                                                                                                                                                                                                                                                                                                                                                                                                                                                                                                                                                                                                                                                                                                                                                                                                                                                                                                                                 |
| Complete List of Authors:     | <p>Newton, Robert; Edith Cowan University, Exercise Medicine Research Institute; University of Queensland, School of Human Movement and Nutrition Sciences</p> <p>Christophersen, Claus; Edith Cowan University, School of Medical and Health Sciences; Curtin University - Perth City Campus, School of Molecular &amp; Life Science</p> <p>Fairman, Ciaran; Edith Cowan University, Exercise Medicine Research Institute; Edith Cowan University, School of Medical and Health Sciences</p> <p>Hart, Nicolas; Edith Cowan University, Exercise Medicine Research Institute; University of Notre Dame Australia, Institute for Health Research</p> <p>Taaffe, Dennis; Edith Cowan University, Exercise Medicine Research Institute; University of Queensland, School of Human Movement and Nutrition Sciences</p> <p>Broadhurst, David; Edith Cowan University, School of Science; Edith Cowan University, Centre for Integrative Metabolomics and Computational Biology</p> <p>Devine, Amanda; Edith Cowan University, School of Medical and Health Sciences; Edith Cowan University, Centre for Integrative Metabolomics and Computational Biology</p> <p>Chee, Raphael ; Edith Cowan University, Exercise Medicine Research Institute; Genesis CancerCare, Radiation Oncology</p> <p>Tang, Colin; Sir Charles Gairdner Hospital, Department of Radiation Oncology</p> <p>Spry, Nigel; Genesis CancerCare, Joondalup, WA, Australia; Edith Cowan University, Exercise Medicine Research Institute</p> <p>Galvão, Daniel; Edith Cowan University, Exercise Medicine Research Institute; Edith Cowan University, School of Medical and Health Sciences</p> |
| Keywords:                     | Inflammation, Bowel, Faecal, Resistance, aerobic, metabolomics                                                                                                                                                                                                                                                                                                                                                                                                                                                                                                                                                                                                                                                                                                                                                                                                                                                                                                                                                                                                                                                                                                                                                                                                                                                                                                                                                                                                                                                                                                                                                                                              |
|                               |                                                                                                                                                                                                                                                                                                                                                                                                                                                                                                                                                                                                                                                                                                                                                                                                                                                                                                                                                                                                                                                                                                                                                                                                                                                                                                                                                                                                                                                                                                                                                                                                                                                             |

SCHOLARONE™  
Manuscripts

## Does exercise impact gut microbiota composition of men receiving androgen deprivation therapy for prostate cancer? An exploratory study protocol.

Robert U. Newton, PhD<sup>1,2,3</sup>; Claus T. Christophersen, PhD<sup>2,4</sup>; Ciaran M. Fairman, PhD<sup>1,2</sup>; Nicolas H. Hart, PhD<sup>1,2,5</sup>; Dennis R. Taaffe, PhD, DSc, MPH<sup>1,2,3</sup>; David I. Broadhurst, PhD<sup>6,7</sup>; Amanda Devine, PhD<sup>2,7</sup>; Raphael Chee MD<sup>1,2,8,9</sup>; Colin I. Tang MD<sup>10</sup>; Nigel A. Spry, MD PhD<sup>1,2,8,11</sup>; Daniel A. Galvão, PhD<sup>1,2</sup>

### *From:*

<sup>1</sup> Exercise Medicine Research Institute, Edith Cowan University, Perth, W.A., Australia;

<sup>2</sup> School of Medical and Health Sciences, Edith Cowan University, Perth, W.A., Australia;

<sup>3</sup> School of Human Movement and Nutrition Sciences, University of Queensland, Brisbane, Q.L.D, Australia;

<sup>4</sup> School of Molecular & Life Sciences, Curtin University, W.A., Australia;

<sup>5</sup> Institute for Health Research, University of Notre Dame Australia, Perth, W.A., Australia;

<sup>6</sup> School of Science, Edith Cowan University, Perth, W.A., Australia;

<sup>7</sup> Centre for Integrative Metabolomics and Computational Biology, Edith Cowan University, Perth, W.A., Australia;

<sup>8</sup> Radiation Oncology, Genesis CancerCare, Perth, W.A., Australia;

<sup>9</sup> School of Surgery, University of Western Australia, Perth, W.A., Australia;

<sup>10</sup> Department of Radiation Oncology, Sir Charles Gairdner Hospital, Perth, W.A., Australia;

<sup>11</sup> School of Medicine and Pharmacology, University of Western Australia, Perth, W.A., Australia

### **Corresponding Author:**

Prof. Robert U. Newton – PhD, AEP, CSCS\*D, FESSA, FNSCA.

Exercise Medicine Research Institute

Edith Cowan University, 270 Joondalup Drive, Joondalup

Perth, Western Australia, Australia – 6027.

Ph: +61 8 6304 3443

Fax: +61 8 6304 2499

Email: [r.newton@ecu.edu.au](mailto:r.newton@ecu.edu.au)

**Short Title:** *Exercise and Gut Microbiota Composition.*

**Key Words:** inflammation, bowel, faecal, resistance, aerobic, metabolomics

1  
2  
3 **Word Count: 3813**  
4  
5  
6  
7  
8  
9  
10  
11  
12  
13  
14  
15  
16  
17  
18  
19  
20  
21  
22  
23  
24  
25  
26  
27  
28  
29  
30  
31  
32  
33  
34  
35  
36  
37  
38  
39  
40  
41  
42  
43  
44  
45  
46  
47  
48  
49  
50  
51  
52  
53  
54  
55  
56  
57  
58  
59  
60

For peer review only

## ABSTRACT

**Introduction:** A potential link exists between prostate cancer disease and treatment and increased inflammatory levels caused by dysbiosis in the gut. This study aims to examine if exercise favourably alters gut microbiota in men receiving androgen deprivation therapy (ADT) for prostate cancer. Specifically, this study will explore whether: 1) exercise improves the composition of gut microbiota and increases the abundance of bacteria associated with health-promotion; and 2) whether gut health correlates with favourable inflammatory status, bowel function, continence, and nausea among patients participating in the exercise intervention.

**Methods and Analysis:** A single-blinded, two-armed, randomised controlled trial will explore the influence of a 3-month exercise program (3 days per week) for men with prostate cancer receiving ADT. Sixty patients will be randomly assigned to either exercise intervention or usual care. The primary endpoint (gut health and function assessed via fecal samples) and secondary endpoints (self-reported quality of life via standardised questionnaires, blood biomarkers, body composition and physical fitness) will be measured at baseline and following the intervention. A variety of statistical methods will be used to understand the covariance between microbial diversity and metabolomics profile across time and intervention, including classical parametric and nonparametric univariate statistical methods, as well as multivariate projection models. An intention-to-treat approach will be utilised for the analyses with multiple imputations followed by a secondary sensitivity analysis to ensure data robustness using a complete cases approach.

**Ethics and Dissemination:** Ethics approval was obtained from the Human Research Ethics Committee of Edith Cowan University (ID: 19827 NEWTON). If exercise is proven to result in favourable changes in gut microbial diversity, composition and metabolic profile, and reduce gastrointestinal complications (inflammation, constipation, diarrhoea, and nausea) in prostate cancer patients receiving ADT, this study will form the basis of a future phase III trial.

**Trial Registration:** ANZCTR-12618000280202

**Registration Details:** 22<sup>nd</sup> February, 2018 – (prospectively registered).

## Strengths and Limitations

- This study is among the first to examine the effects of an exercise medicine program on gut microbiota in men receiving androgen deprivation therapy for prostate cancer.
- Lack of follow-up past 13-weeks prohibits any assessment of sustainability of effects.
- The inclusion criteria prevents generalizability to the other types of cancer.

## INTRODUCTION

Gut microbiota play a fundamental role in protection from pathogens, in the induction and function of the immune system, and in the promotion of digestion and absorption of dietary nutrients for energy production.<sup>1-3</sup> Indeed, perturbations of the composition and function of gut microbiota can cause gastrointestinal (GI) complications, and contribute to the pathogenesis of metabolism and disease processes such as inflammation, infection and tumours.<sup>4-6</sup>

Androgen deprivation therapy (ADT) is extensively used as a neoadjuvant, adjuvant and/or standalone treatment for men with prostate cancer,<sup>7</sup> however, survivors are burdened with persistent adverse effects of ADT including GI complications.<sup>8-12</sup> Despite a paucity of research into the mechanisms associated with GI diseases in prostate cancer survivors, it is hypothesised that a dysbiotic composition of the gut microbiome may mediate negative outcomes of GI complications associated with prostate cancer.<sup>13-17</sup> Indeed, results from murine models demonstrate that castration and antiandrogens can affect the composition of gut microbiota.<sup>18,19</sup> The complex, dynamic interaction between sex hormones and gut microbiome is still poorly understood.<sup>20</sup> Nevertheless, Markle et al (2013) demonstrated that elevated levels of testosterone in female mice results in favourable changes in microbiota, metabolomics, and inflammation, lending potential support for the role of ADT in adverse

1  
2  
3 changes to gut microbiota.<sup>21,22</sup> To address gut dysbiosis, especially for those with cancer,  
4  
5 recent interventions have focused on the use of probiotics or prebiotics to alleviate  
6  
7 symptoms<sup>2</sup>, indicating that the manipulation of gut microbiota could be a viable therapeutic  
8  
9 strategy for men with prostate cancer.<sup>23,24</sup>  
10

11  
12  
13 Perhaps unsurprisingly, emerging evidence indicates that exercise may exert a  
14  
15 positive effect on gut microbial composition.<sup>2,25</sup> In non-cancer cohorts, a link between  
16  
17 exercise and gut microbial diversity, composition and beneficial metabolite production has  
18  
19 been illustrated.<sup>26-28</sup> Of note, the ratio of Firmicutes to Bacteroidetes phyla is of particular  
20  
21 importance, with obese individuals having a higher Firmicutes to Bacteroidetes ratio which is  
22  
23 indicative of poorer gut health.<sup>29,30</sup> Importantly, it has been consistently demonstrated that  
24  
25 men on ADT experience considerable unfavourable shifts in body composition, indicated by  
26  
27 a significant loss of lean body mass coupled with an increase in fat mass.<sup>31-33</sup> Consequently,  
28  
29 men on ADT may be at a heightened risk for this altered ratio of Firmicutes to Bacteroidetes.  
30  
31 The shift in relative abundances of these phyla is suggested to result in an increased ability to  
32  
33 harvest energy from food and promote low-grade inflammation.<sup>34</sup> Whereas, a microbiota in  
34  
35 homeostasis and the presence of *Lactobacillus* and *Bifidobacterium* can exert anti-  
36  
37 inflammatory effects at local and systemic levels, indicating a potential link between the gut  
38  
39 microbiota health and inflammatory status.<sup>35</sup>  
40  
41  
42  
43  
44  
45

46 Metabolites are molecules that have critical roles in cellular metabolism, energy  
47  
48 production and storage, apoptosis and signal transduction, and are affected by diet, exercise  
49  
50 and gut microbiota amongst others. Indeed, the metabolomic profile has been suggested to be  
51  
52 indicative of disease state in cancer and identified as a potential biomarker of the  
53  
54 development and progression of prostate cancer.<sup>36</sup> Consequently, an exploration of the  
55  
56  
57  
58  
59  
60

1  
2  
3 relationships between changes in gut microbiota composition, metabolomic profile,  
4 inflammatory status and bowel function could have important clinical implications through  
5 enhancing positive exercise-induced effects on these outcomes through the manipulation of  
6 the composition of gut microbiota. Although the potential for exercise to modulate gut  
7 microbiota is promising, a paucity of research in the area exists, particularly in individuals at  
8 risk for gut dysbiosis. As such, no prior investigation has been conducted to determine  
9 whether gut microbiota composition is influenced by exercise in prostate cancer survivors.<sup>37</sup>  
10  
11  
12  
13  
14  
15  
16  
17  
18  
19

20 The aim of this exploratory study is to determine the effect of exercise medicine on  
21 gut microbiota and its metabolome in men receiving ADT for prostate cancer (PCa).  
22 Specifically, we will explore whether: 1) exercise improves composition of the gut  
23 microbiota and increases abundance of health-promoting bacterial species, thereby driving an  
24 advantageous faecal metabolomic profile, and 2) improved gut health correlates with  
25 favourable inflammatory status, bowel function, continence, nausea and appetite among  
26 patients participating in the exercise intervention. It is hypothesised that the exercise program  
27 will result in favourable changes in the composition of gut microbiota, and that these changes  
28 will be correlated with improvements in inflammatory status, bowel function and other GI  
29 issues. This study will serve to provide a better understanding of whether the gut microbiota  
30 and its metabolites can be modulated by exercise as a potential therapeutic target that can be  
31 offered for prostate cancer patients on ADT.  
32  
33  
34  
35  
36  
37  
38  
39  
40  
41  
42  
43  
44  
45  
46

## 47 **METHODS**

### 48 **Study Design**

49  
50 This is a single-blinded (investigators blinded to group allocation), randomised controlled  
51 trial, designed to measure the impact of a supervised exercise medicine intervention on gut  
52  
53  
54  
55  
56  
57  
58  
59  
60



1  
2  
3 microbiota and its metabolome of prostate cancer patients receiving ADT. An 'exercise'  
4 group will receive a 12-week supervised exercise program comprising aerobic and resistance  
5 exercise undertaken three times per week. A 'usual care' group will continue to receive usual  
6 medical care during the trial. The 'usual care' group will be offered an exercise program  
7 following their control period to minimise study contamination and to reduce patient  
8 withdrawal and loss to follow-up.  
9  
10  
11  
12  
13  
14  
15  
16  
17

### 18 **Participants**

19  
20 Sixty men (n=60) with localised or locally advanced prostate cancer, who are currently on  
21 ADT (and expected to remain on ADT for the next three months) are eligible to enrol in this  
22 study and will be randomised to 'exercise' or 'usual care'.  
23  
24  
25  
26  
27

28  
29 Participants will be excluded if they have any visceral or bone metastases (i.e. advanced, or  
30 castrate-resistant prostate cancer); are being treated for any secondary or other cancers;  
31 previously received or currently receiving chemotherapy; currently receiving radiation  
32 therapy or any non-approved experimental therapies; and/or previously had any prior  
33 gastrointestinal surgery. Patients will also be excluded if they have taken antibiotics,  
34 prebiotics, probiotics, nutritional or ergogenic compliments or supplements within 3 months  
35 prior to study enrolment; have recently had a prostatectomy, orchiectomy, or received  
36 radiation therapy within 12 months prior to study enrolment; have any physical, mental or  
37 other contraindications to exercise; and/or cannot (or have difficulty) understanding English.  
38  
39 Participants will be excluded if they currently engage in regular, structured physical activity  
40 (aerobic or resistance training for 2 or more times per week in the previous 3 months). All  
41 participants must receive medical clearance from their managing physician to be eligible to  
42 enroll.  
43  
44  
45  
46  
47  
48  
49  
50  
51  
52  
53  
54  
55  
56  
57  
58  
59  
60

## Recruitment

Men with localised or locally advanced prostate cancer, who are currently receiving ADT, will be recruited by invitation of their attending specialist (i.e. urologist or radiation oncologist), who will provide clinically eligible patients with a study information sheet and referral to the study coordinator. If patients are interested in participation, and their eligibility is confirmed, they will receive an informed consent document to read and sign in the presence of a study investigator and/or clinical research coordinator prior to completing baseline measures and randomisation.

## Randomisation

Prostate cancer patients will be randomly allocated in a ratio of 1:1 to two study arms: exercise or usual care, stratified by age ( $\leq 60$  years,  $>60$  years), time on ADT ( $\leq 6$  months,  $>6$  months), and prior prostatectomy or radiation therapy (Yes, No) for approximate balance between groups in order to mitigate confounding factors pertaining to variations due to ageing (i.e. differences in physical function, sarcopenia, osteopenia and osteoporosis) and to account for variations in treatment. All patients will be required to be on ADT prior to, and during the study, as per standard of care for this patient population. A research officer with no patient contact will be responsible for the randomisation of patients into groups using a computer-generated random assignment program. Study investigators and the exercise physiologists conducting testing procedures will be blinded to group allocation. Only exercise physiologists who are not part of the research team will be permitted to deliver the exercise intervention to participants in order to maintain integrity of the blinding process.

- **Insert Figure 1 here** -

## Measurements

Primary and secondary endpoints will be undertaken at baseline (Week 0), and post-intervention (Week 13). All procedures and assessment tools have proven validity and reliability and are used widely throughout clinical research.

- Enter table 1 here -

### *Primary Endpoint*

#### *Gut Health and Dysbiosis*

Gut health will be assessed through the provision of a 24-hour collection of stool sample(s), subsequently examined and analysed for microbial composition (using bacterial DNA), bacterial metabolites and for faecal calprotectin. Briefly, participants will be provided with a 24-h collection kit for collection of all bowel movements within that time. The kit includes a high performance cooler bag (Techni Ice), 2 gel ice packs (Techni Ice), collection bags, Bristol stool chart to classify stool and instructions. The cooler bag has been tested in our laboratory to maintain temperature at 4°C for 24-36 hours, and 4°C has been shown to not significantly alter faecal microbiota diversity or composition.<sup>38</sup> Sample storage conditions influence faecal microbiome.<sup>38</sup> In addition, we have also showed that there is no significant difference in faecal short chain fatty acid (SCFA) levels between cool temperature storage and immediate freezing of the stool sample at -20°C (data not shown). Samples will be returned to the laboratory within 12-24 hours following collection and stored at -80 °C in a biomedical freezer (Forma 88700 ULT; Thermo Fisher Scientific Inc., Waltham, MA, USA) until they are homogenised (combined if >1 sample over the 24h) and partitioned into aliquots for analysis.

1  
2  
3 To extract microbial DNA, samples are lysed using both mechanical and enzymatic  
4 breakdown of the bacterial cell membranes and the DNA is extracted using the QIAamp  
5 PowerFecal DNA kit (Qiagen; Hilden, Germany). Microbiome signatures are generated using  
6 the Illumina MiSeq platform using barcoded primer, V4 (515-806). Quality control samples  
7 are included in the analysis from sample collection to sequence analysis and all samples are  
8 individually screened for PCR efficiency prior to building sequence libraries. For building the  
9 sequence libraries, a PCR-free ligation protocol is deployed with sample barcodes that are  
10 never reused in our laboratory. Samples will be sequenced to a depth of minimum 30,000  
11 reads, which is sufficient to identify microbes to a genus/species level.  
12  
13  
14  
15  
16  
17  
18  
19  
20  
21  
22  
23

24 qPCR will be used to verify shifts observed in the sequence data. This will provide a detailed  
25 picture of longitudinal changes in gut microbial community structure with treatment and  
26 following exercise. Sequence data/output is demultiplexed and initial sequence quality  
27 control assessments are performed with chimera's removed. The amplicon data will be  
28 analysed using a combination of bioinformatics and statistical software packages. GHAP, an  
29 in-house amplicon clustering and classification pipeline built around tools from USearch<sup>39</sup>  
30 and RDP<sup>40</sup>, combined with locally-written tools for demultiplexing will be used for  
31 classification of reads into OTU's and their phylogenetic linkage. For multivariate analysis  
32 Primer7 and Permavona+ (PRIMER-E, Plymouth) will be used. Principal Coordinates  
33 Analysis (PCoA) will be deployed initially to visualise findings. Whereas, distance-based  
34 linear models (DISTLM) and distance-based redundancy analysis (dbRDA) are used for more  
35 in-depth analysis and to integrate microbiome findings with other metadata (like metabolites  
36 and diet information) that may help explain the relationship between the microbiome findings  
37 and these outcomes.  
38  
39  
40  
41  
42  
43  
44  
45  
46  
47  
48  
49  
50  
51  
52  
53  
54  
55  
56  
57  
58  
59  
60

1  
2  
3 The faecal metabolome contains over 6,000 known endogenous and exogenous metabolites,  
4 comprised of many classes, each with unique chemical properties; thus no single analytical  
5 platform can be used to measure the entire metabolome in a single assay. Untargeted  
6 metabolite profiles (>2,000 metabolite features) will be measured in faecal samples using  
7 high-throughput mass-spectrometry technologies consisting of 2 complementary analytical  
8 platforms in 6 modes of operation: GC-QTOF MS (EI & CI modes) and LC-QTOF MS  
9 (Reverse Phase and HILIC Chromatography with both positive & negative ionisation modes).  
10 Resulting data will provide a comprehensive systems overview of metabolome disruption of  
11 the gut microbiota due to prostate cancer and ADT, as well as alterations resulting from the  
12 exercise intervention. All analyses will be performed at the Centre for Integrative  
13 Metabolomics & Computational Biology (CiMCB; Edith Cowan University, Perth,  
14 Australia). Additional targeted analysis methods will be used for accurate quantification of  
15 short chain fatty acids; Formate, Acetate, Propionate, Butyrate, Isobutyrate, Valerate, and  
16 Isovalerate metabolites. Faecal calprotectin will also be measured as a biomarker of  
17 inflammation to monitor gut inflammation<sup>41</sup>.

### ***Secondary Endpoints***

#### *Dietary Behaviour*

18 Habitual dietary intake will be assessed using the Dietary Questionnaire for Epidemiological  
19 Studies (DQES, Version 2.0; Cancer Council of Victoria, Melbourne, Australia) which is a  
20 modified food frequency questionnaire (FFQ) relevant to cancer populations. A research  
21 assistant will supervise the completion of the DQES and use food models and charts, metric  
22 cups and spoons to increase accuracy. All participants will be instructed to maintain their  
23 habitual dietary patterns throughout the study. DQES data will be collated and batch analysed  
24 at the conclusion of the study by the Nutritional Assessment Office (Cancer Council of  
25  
26  
27  
28  
29  
30  
31  
32  
33  
34  
35  
36  
37  
38  
39  
40  
41  
42  
43  
44  
45  
46  
47  
48  
49  
50  
51  
52  
53  
54  
55  
56  
57  
58  
59  
60

1  
2  
3 Victoria, Melbourne, Australia). Dietary analysis will include food item frequency and a  
4  
5 comprehensive nutrient intake analysis.  
6  
7

### 8 9 10 *Biomarkers*

11 Fasted blood samples will be collected and analysed commercially by an accredited National  
12 Association of Testing Authorities laboratory (Australian Clinical Labs, Perth, Australia) for  
13 glucose, high-sensitivity C-reactive protein (CRP), Tumor necrosis factor-alpha (TNF- $\alpha$ ),  
14 interleukin-6 (IL-6), cholesterol (total, high-density lipoprotein, low-density lipoprotein) and  
15 prostate specific antigen (PSA). Additional serum (SST, 8ml) and plasma (EDTA, 9ml)  
16 samples will be collected at baseline and post-intervention visits by a certified phlebotomist,  
17 and will be processed and stored in a -80°C biomedical freezer (Forma 88700 ULT; Thermo  
18 Fisher Scientific Inc., Massachusetts, USA) for subsequent metabolomics analysis at the  
19 CiMCB.  
20  
21  
22  
23  
24  
25  
26  
27  
28  
29  
30  
31  
32

### 33 34 *Clinical Data*

35 Prostate cancer participant medical history, including prostate cancer diagnosis (i.e. Gleason  
36 score, stage of cancer, months since diagnosis, treatment history and time on ADT),  
37 comorbidities (i.e. hypertension, osteoarthritis, and others), concomitant medications (i.e.  
38 opioids, beta-blockers, anti-hypertensives, blood cholesterol and others), and other diagnosed  
39 chronic diseases (i.e. osteoporosis, diabetes, cardiovascular disease and others) will be  
40 sourced from patient medical records. Further, information pertaining to any related history  
41 of bowel symptoms<sup>42</sup>, gastrointestinal symptoms<sup>43</sup>, and other bowel-related conditions  
42 (Bristol Stool Chart)<sup>44</sup> will also be obtained.  
43  
44  
45  
46  
47  
48  
49  
50  
51  
52  
53  
54

55 *Quality of life, bowel function, continence, nausea & appetite.*  
56  
57  
58  
59  
60

1  
2  
3 Cancer-specific quality of life indices will be measured using the European Organisation for  
4 Research and Treatment of Cancer Quality of Life Questionnaire Core 30 (EORTC-QLQ-  
5 C30),<sup>45</sup> assessing five functional scales (physical, role, emotional, cognitive, and social  
6 functioning), three symptom scales (fatigue, pain, nausea and vomiting), a global health  
7 scale, and six single items (dyspnea, insomnia, appetite loss, constipation, diarrhoea and  
8 financial difficulty). Prostate cancer specific quality of life indices will be measured using the  
9 EORTC-Prostate Cancer Module (EORTC QLQ-PR25),<sup>46</sup> assessing urinary symptoms,  
10 bowel symptoms, treatment-related symptoms and sexual functioning.  
11  
12  
13  
14  
15  
16  
17  
18  
19  
20  
21

### 22 *Anthropometric and Body Composition Measures*

23  
24 Stature will be recorded to the nearest 1 cm using a wall-mounted stadiometer (Model 222,  
25 Seca, Hamburg, DE), with body mass recorded to the nearest 0.1 kg using an electronic scale  
26 (AE Adams CPW Plus-200, Adam Equipment, Connecticut, USA). Whole body fat  
27 percentage, fat mass and lean mass will be measured using Dual-energy X-ray  
28 Absorptiometry (DXA; Horizon A, Hologic Inc., Massachusetts, USA), with whole-body and  
29 appendicular segmentations generated in accordance with Hart and colleagues.<sup>47</sup>  
30  
31  
32  
33  
34  
35  
36  
37  
38  
39  
40

### 41 *Physical Fitness*

42 A battery of standard tests will be used to assess physical fitness, including: 1) muscle  
43 strength, using one-repetition maximum (1RM) tests for chest press, seated row and leg press  
44 exercises; 2) aerobic fitness, using the 400-metre walk test; and 3) physical function, using  
45 the timed up and go, 6-metre walk test (normal, fast and backward) and repeated chair  
46 rise.<sup>48,49</sup>  
47  
48  
49  
50  
51  
52  
53  
54

### 55 **Exercise Program**

1  
2  
3 Patients assigned to the exercise arm will attend three clinic-based supervised exercise  
4 sessions each week for 12 weeks consisting of moderate-to-high intensity resistance and  
5 aerobic exercise (interval and continuous). Each session will take approximately 60 minutes,  
6 including warm-up and cool-down, and will be supervised by accredited exercise  
7 physiologists (AEP, Exercise and Sports Science Australia). The exercise program is  
8 designed to provide optimal stimulus to the cardiorespiratory and neuromuscular systems  
9 while maximising safety, compliance and retention, thus will be tailored, progressive,  
10 periodised and autoregulated in collaboration with the patient (i.e. adjusted based on the  
11 patient's presentation at each session).  
12  
13  
14  
15  
16  
17  
18  
19  
20  
21  
22  
23

24 Resistance exercise will be prescribed using repetition maximums (RM), where patients will  
25 be required to perform 6-8 different resistance exercises using major muscle groups, at 6-12  
26 RM (the maximal weight that can be lifted 6 to 12 times each set, equivalent to ~60-85% of  
27 1RM) for 3-4 sets per exercise to achieve moderate-to-high intensity and volume. Aerobic  
28 exercise will include 20 to 30 minutes of moderate-to-vigorous intensity activity (equating to  
29 ~60-85% of estimated maximum heart rate; or a rating of perceived exertion (RPE) between  
30 6-8 using the BORG 10 point scale<sup>50</sup>) involving a variety of modes including walking,  
31 jogging, cycling or rowing, using treadmills and/or stationary ergometers. Aerobic intensity  
32 will be monitored using heart rate monitors (Polar M400, H10 Sensor, Polar Electro, NSW,  
33 Australia) and an RPE chart for assessment. Patients will also be encouraged to perform  
34 additional aerobic exercise (such as brisk walking), outside of their supervised exercise clinic  
35 visits, progressing toward accruing a volume of activity consistent with national guidelines  
36 for health (i.e. 150 minutes of physical activity, or a further ~60-90 minutes self-managed).  
37 Participants will be provided log books to detail aerobic activity, which will be reviewed in  
38 the clinic each week. Flexibility exercises for all joints considered important for function and  
39  
40  
41  
42  
43  
44  
45  
46  
47  
48  
49  
50  
51  
52  
53  
54  
55  
56  
57  
58  
59  
60



1  
2  
3 for all muscles engaged during the session will be provided during the cool-down phase of  
4  
5 each exercise session.  
6  
7

### 8 9 **Statistical Analysis**

10  
11 These sample sizes (n=30 per group, totalling n=60) have been chosen to determine a  
12  
13 moderate standardised effect ( $d = 0.8$ ) for the primary and most secondary outcome measures  
14  
15 (alpha=0.05).  
16  
17

18  
19  
20 A variety of statistical methods will be used to understand the covariance between microbial  
21  
22 diversity and metabolomics profile across time and intervention, including using classical  
23  
24 parametric and nonparametric univariate statistical methods (e.g. repeated measure ANOVA),  
25  
26 as well as multivariate projection models (such as Principal Components Analyses, and  
27  
28 Partial Least Squares Discriminant Analyses). The purpose of this initial stage of data  
29  
30 analysis will be to uncover latent correlated biochemical structure in the data, mapping  
31  
32 metabolite concentrations to metabolic pathways, and ultimately to determine candidate  
33  
34 metabolic signatures associated with dysregulation of the gut microbiome. The resulting  
35  
36 metabolite signatures will be integrated with quantified SCFA measurements to contextualise  
37  
38 the results. The metabolomic and metagenomic data will be integrated using latent structure  
39  
40 projection techniques including OnPLS48, Multiblock Component Analysis<sup>51</sup> and  
41  
42 Regularized Generalized Canonical Correlation Analysis (RGCCA)<sup>52</sup>, which extracts a  
43  
44 minimal number of globally predictive orthogonal latent components that exhibit maximal  
45  
46 covariance and correlation between data blocks. This will allow us to perform metabolite  
47  
48 functional mapping, which will allow us to start unpacking the biochemical mechanism of  
49  
50 microbiome/exercise interaction.  
51  
52  
53  
54  
55  
56  
57  
58  
59  
60

1  
2  
3 Statistical analyses will also include descriptive characteristics, t-tests, effect size and two-  
4 way (group x time) repeated measures ANOVA (or analysis of covariance). For categorical  
5 variables, Pearson chi-square will be used. Data will be examined using an intention-to-treat  
6 approach with multiple imputations followed by a secondary sensitivity analysis to ensure  
7 data robustness using a complete cases approach.  
8  
9  
10  
11  
12

### 13 14 15 **Patient and Public Involvement**

16  
17 The Exercise Medicine Research Institute (EMRI) has consumer representatives (cancer  
18 patients, survivors and their family members) who volunteer their time to provide input into  
19 research directions and study designs. Furthermore, the study clinicians (NAS, CIT, RC)  
20 consult within the major public and private hospitals in Perth, Western Australia, each with  
21 high prostate cancer caseloads, thus have used patient priorities, patient experience and  
22 patient preferences to help inform the development of the research questions and outcome  
23 measures, while aiding the study protocol to engage participants in a respectful, ethical and  
24 impactful way.  
25  
26  
27  
28  
29  
30  
31  
32  
33  
34  
35  
36  
37

### 38 **Ethics and Dissemination**

39  
40 Ethics approval was obtained from the Human Research Ethics Committee (HREC) of Edith  
41 Cowan University (ID: 19827 NEWTON), with additional approval provided by the  
42 Radiation, Biosafety and Hazardous Substances Committee (RBHSC). If exercise is proven  
43 to result in favourable changes in gut microbial diversity, composition and metabolic profile,  
44 and reduce gastrointestinal complications (inflammation, constipation, diarrhoea, and nausea)  
45 in prostate cancer patients receiving ADT, this study will form the basis of a future phase III  
46 trial. These outcomes will provide further validation of exercise medicine in this population  
47 and add to efforts aimed at changing clinical practice. To reach a maximum number of  
48  
49  
50  
51  
52  
53  
54  
55  
56  
57  
58  
59  
60

1  
2  
3 clinicians, practitioners, patients and scientists, the results of this study will be published in  
4 international, high-impact peer-reviewed clinical and academic journals. In addition,  
5 outcomes will be disseminated through national and international clinical, medical or  
6 academic conferences and oncology clinic and patient meetings. Finally, EMRI and the  
7 broader study team work closely with the Prostate Cancer Foundation of Australia (PCFA),  
8 their support groups and states offices. PCFA will assist in the translation and dissemination  
9 of the research findings to community members, and cancer support groups, while study  
10 participants will receive their individual results in addition to overall study findings.  
11  
12  
13  
14  
15  
16  
17  
18  
19  
20  
21  
22  
23

## 24 **Discussion**

25  
26 Prostate cancer patients are burdened with persistent adverse effects of treatment, including  
27 gastrointestinal (GI) complications.<sup>8-12</sup> It has been hypothesized that the hormonal  
28 consequences of ADT may have an adverse effect on the composition of gut microbiota.<sup>22</sup>  
29 Perturbations of the composition and function of gut microbiota can cause GI complications  
30 and contribute to the development and pathogenesis of metabolism and disease processes  
31 such as inflammation, infections and disease progression.<sup>15</sup> Additionally, the metabolomic  
32 profile of prostate cancer patients could be an important biomarker for disease state and  
33 progression.<sup>36</sup> Consequently, an examination of therapeutic strategies to induce clinically  
34 meaningful improvements in the gut microbiome, metabolomic profile and inflammatory  
35 status is warranted.  
36  
37  
38  
39  
40  
41  
42  
43  
44  
45  
46  
47  
48  
49  
50

51 Preliminary evidence indicates that exercise, independent of diet, may result in favourable  
52 changes in gut microbial diversity and composition, which has the potential to improve  
53 overall metabolic and health profile.<sup>53</sup> While this research is promising, much of this area is  
54  
55  
56  
57  
58  
59  
60

1  
2  
3 in its infancy, with a substantial lack of evidence in a cancer context. Given the paucity of  
4 data, coupled with the potential negative health effects of gut dysbiosis in prostate cancer,  
5 there is a clear need to directly evaluate the relationship between exercise and gut microbiota  
6 in this patient population. The protocol outlined in this paper will evaluate the effects of  
7 exercise on changes in the composition and diversity of gut microbiota and if these changes  
8 are correlated with favourable inflammatory status, bowel function, continence, nausea and  
9 appetite among patients participating in the exercise intervention.  
10  
11  
12  
13  
14  
15  
16  
17  
18  
19

20 Excess adiposity is associated with a heightened inflammatory state and gut dysbiosis.<sup>54</sup>  
21 Exercise has been previously demonstrated to successfully attenuate and/or reverse the  
22 accumulation of fat mass experienced by PCa patients undergoing ADT.<sup>48,49,55</sup> Consequently,  
23 it's biologically plausible that improvements in lean body mass and overall body composition  
24 may mediate favourable changes in the composition of gut microbiota, inflammatory status,  
25 and metabolomic profile. Moreover, gut dysbiosis has been associated with frailty in older  
26 adults.<sup>56-58</sup> Though a causal relationship cannot be determined, improvements in muscle  
27 strength and physical function from exercise may contribute to improvements in the  
28 composition of gut microbiota in this population. Consequently, analysis of body  
29 composition and physical fitness will provide valuable information on any factors that may  
30 mediate changes in gut microbiome from exercise.<sup>59</sup>  
31  
32  
33  
34  
35  
36  
37  
38  
39  
40  
41  
42  
43  
44  
45  
46

47 If demonstrated that this exercise intervention results in clinically meaningful improvements  
48 in gut health, the outcomes of this trial will provide innovative, new evidence that can inform  
49 the design of future phase III clinical trials to further elucidate the effects of exercise on gut  
50 health in patients with PCa. Further, any correlations between changes in the composition and  
51  
52  
53  
54  
55  
56  
57  
58  
59  
60

1  
2  
3 diversity of gut microbiota and inflammatory status, and gastrointestinal issues, may inform  
4  
5 design of future research studies that further explore these relationships.  
6  
7  
8  
9

## 10 **ACKNOWLEDGEMENTS**

11  
12  
13 The authors wish to thank Dr Lydia Hearn for her assistance with preparing the manuscript,  
14  
15 and the consumer representatives who donated their time to review the study concept and  
16  
17 provide input into the study protocol. The authors would also like to thank the many members  
18  
19 of the community who donate to, and volunteer for, the Prostate Cancer Foundation of  
20  
21 Australia which has funded this study.  
22  
23  
24  
25  
26  
27

## 28 **FUNDING STATEMENT**

29  
30  
31 This study is funded by Prostate Cancer Foundation Australia (PCFA), New Concepts Grant  
32  
33 scheme. NHH is supported by Cancer Council Western Australia Postdoctoral Fellowship.  
34  
35 DRT and DB are supported by Professorial Research Fellowships of Edith Cowan University.  
36  
37 CMF is supported by a NHMRC Centre of Research Excellence (Prostate Cancer  
38  
39 Survivorship) Postdoctoral Fellowship.  
40  
41  
42  
43  
44  
45

## 46 **CONFLICT OF INTEREST**

47  
48 The authors declare there are no conflicts of interest.  
49  
50  
51  
52  
53

## 54 **CONTRIBUTION STATEMENT**

1  
2  
3 All authors (RUN, CTC, NHH, DRT, DIB, AD, RC, CMF, CIT, NAS and DAG) contributed  
4 to the design and development of the study protocol. RUN, CTC, NHH, DRT, DIB, AD,  
5 CMF and DAG contributed to writing and editing of the manuscript. RC, CIT and NAS  
6 provided clinical input to the editing of the manuscript and will provide patient referrals to  
7 the study. All authors reviewed and approved the study protocol and have met the  
8 International Committee of Medical Journal Editors (ICMJE) recommendations.  
9  
10  
11  
12  
13  
14  
15  
16  
17  
18

## 19 LEGENDS OF FIGURES AND TABLES

20  
21  
22 Table 1. Schedule of assessments at baseline and post intervention

23  
24 Figure 1. CONSORT (Consolidated Standards of Reporting Trials) diagram.png  
25  
26  
27  
28

## 29 REFERENCES

- 30  
31 1. Belkaid Y, Hand TW. Role of the microbiota in immunity and inflammation. *Cell*.  
32 2014;157(1):121-141.  
33  
34 2. Marchesi JR, Adams DH, Fava F, et al. The gut microbiota and host health: a new  
35 clinical frontier. *Gut*. 2016;65(2):330-339.  
36  
37 3. Wu H-J, Wu E. The role of gut microbiota in immune homeostasis and autoimmunity.  
38 *Gut Microbes*. 2012;3(1):4-14.  
39  
40 4. Sanz Y, Olivares M, Moya-Pérez Á, Agostoni C. Understanding the role of gut  
41 microbiome in metabolic disease risk. *Pediatric Research* 2014 77:1-2. 2014;77(1-  
42 2):236-244.  
43  
44 5. Mach N, Fuster-Botella D. Endurance exercise and gut microbiota: A review. *J Sport*  
45 *Health Sci*. 2017;6(2):179-197.  
46  
47 6. Manzoor MAP, Rekha PD. Prostate cancer: Microbiome — the “unforeseen organ.”  
48 *Nat Rev Urol* 2017 14:9. 2017;14(9):521-522.  
49  
50 7. Rhee H, Gunter JH, Heathcote P, et al. Adverse effects of androgen-deprivation  
51 therapy in prostate cancer and their management. *BJU Int*. 2015;115(Suppl.):3-13.  
52  
53 8. Potosky AL, Davis WW, Hoffman RM, et al. Five-year outcomes after prostatectomy  
54 or radiotherapy for prostate Cancer: the prostate cancer outcomes study. *J Natl Cancer*  
55 *Inst*. 2004;96(18):1358-1367.  
56  
57  
58  
59  
60

- 1
- 2
- 3 9. Sanda MG, Dunn RL, Michalski J, et al. Quality of life and satisfaction with outcome
- 4 among prostate-cancer survivors. *N Engl J Med*. 2008;358(12):1250-1261.
- 5
- 6 10. Stensvold A, Dahl AA, Brennhovd B, et al. Bother problems in prostate cancer
- 7 patients after curative treatment. *Urol Oncol*. 2013;31(7):1067-1078.
- 8
- 9 11. King MT, Viney R, Smith DP, et al. Survival gains needed to offset persistent adverse
- 10 treatment effects in localised prostate cancer. *Br J Cancer*. 2012;106(4):638-645.
- 11
- 12 12. Maeda Y, Høyer M, Lundby L, Norton C. Faecal incontinence following radiotherapy
- 13 for prostate cancer: a systematic review. *Radiother Oncol*. 2011;98(2):145-153.
- 14
- 15 13. Frugé AD, Ptacek T, Tsuruta Y, et al. Dietary changes impact the gut microbe
- 16 composition in overweight and obese men with prostate cancer undergoing
- 17 radical prostatectomy. *J Acad Nutr Diet*. 2018;118(4):714–723.e1.
- 18
- 19 14. Amirian ES, Petrosino JF, Ajami NJ, Liu Y, Mims MP, Scheurer ME. Potential role of
- 20 gastrointestinal microbiota composition in prostate cancer risk. *Infect Agents Cancer*.
- 21 2013;8(1):42.
- 22
- 23 15. Golombos DM, Ayangbesan A, O'Malley P, et al. The role of gut microbiome in the
- 24 pathogenesis of prostate cancer: a prospective, pilot study. *Urology*. 2018;111:122-
- 25 128.
- 26
- 27 16. Akaza H. Prostate cancer chemoprevention by soy isoflavones: role of intestinal
- 28 bacteria as the "second human genome". *Cancer Sci*. 2012;103(6):969-975.
- 29
- 30 17. Cavalieri E, Rogan E. The molecular etiology and prevention of estrogen-initiated
- 31 cancers: Ockham's Razor: plurality should not be posited without necessity. *Mol*
- 32 *Aspects Med*. 2014;36:1-55.
- 33
- 34 18. Harada N, Hanaoka R, Horiuchi H, et al. Castration influences intestinal microflora
- 35 and induces abdominal obesity in high-fat diet-fed mice. *Sci Rep*. 2016;6(1):23001.
- 36
- 37 19. Harada N, Hanaoka R, Hanada K, Izawa T, Inui H, Yamaji R. Hypogonadism alters
- 38 cecal and fecal microbiota in male mice. *Gut Microbes*. 2016;7(6):533-539.
- 39
- 40 20. Org E, Mehrabian M, Parks BW, et al. Sex differences and hormonal effects on gut
- 41 microbiota composition in mice. *Gut Microbes*. 2016;7(4):313-322.
- 42
- 43 21. Markle JGM, Frank DN, Mortin-Toth S, et al. Sex differences in the gut microbiome
- 44 drive hormone-dependent regulation of autoimmunity. *Science*. 2013;339(6123):1084-
- 45 1088.
- 46
- 47 22. Klil-Drori AJ, Tascilar K, Yin H, Aprikian A, Bitton A, Azoulay L. Androgen
- 48 deprivation therapy and the incidence of inflammatory bowel disease in patients with
- 49 prostate cancer. *Am J Epidemiol*. 2016;184(1):15-22.
- 50
- 51 23. Bressa C, Bailén-Andrino M, Pérez-Santiago J, et al. Differences in gut microbiota
- 52 profile between women with active lifestyle and sedentary women. *PLoS ONE*.
- 53 2017;12(2):e0171352.
- 54
- 55
- 56
- 57
- 58
- 59
- 60

- 1  
2  
3 24. Flint HJ, Duncan SH, Scott KP, Louis P. Links between diet, gut microbiota  
4 composition and gut metabolism. In: Vol 74. Cambridge University Press; 2015:13-22.  
5
- 6 25. Cerdá B, Pérez M, Pérez-Santiago JD, Tornero-Aguilera JF, González-Soltero R,  
7 Larrosa M. Gut microbiota modification: another piece in the puzzle of the benefits of  
8 physical exercise in health? *Front Physiol.* 2016;7(208):51.  
9
- 10 26. Choi JJ, Eum SY, Rampersaud E, Daunert S, Abreu MT, Toborek M. Exercise  
11 attenuates PCB-induced changes in the mouse gut microbiome. *Environ Health*  
12 *Perspect.* 2013;121(6):725-730.  
13
- 14 27. Petriz BA, Castro AP, Almeida JA, et al. Exercise induction of gut microbiota  
15 modifications in obese, non-obese and hypertensive rats. *BMC Genomics.*  
16 2014;15(1):511.  
17
- 18 28. Evans CC, LePard KJ, Kwak JW, et al. Exercise prevents weight gain and alters the  
19 gut microbiota in a mouse model of high fat diet-induced obesity. *PLoS ONE.*  
20 2014;9(3):e92193.  
21
- 22 29. Mariat D, Firmesse O, Levenez F, et al. The Firmicutes/Bacteroidetes ratio of the  
23 human microbiota changes with age. *BMC Microbiol.* 2009;9(1):123.  
24
- 25 30. Ley RE, Turnbaugh PJ, Klein S, Gordon JI. Microbial ecology: human gut microbes  
26 associated with obesity. *Nature* 2011 472:7341. 2006;444(7122):1022-1023.  
27
- 28 31. Smith MR, Finkelstein JS, McGovern FJ, et al. Changes in body composition during  
29 androgen deprivation therapy for prostate cancer. *J Clin Endocrinol Metab.*  
30 2002;87(2):599-603.  
31
- 32 32. Galvão DA, Spry NA, Taaffe DR, et al. Changes in muscle, fat and bone mass after 36  
33 weeks of maximal androgen blockade for prostate cancer. *BJU Int.* 2008;102(1):44-47.  
34
- 35 33. Boxer RS, Kenny AM, Dowsett R, Taxel P. The effect of 6 months of androgen  
36 deprivation therapy on muscle and fat mass in older men with localized prostate  
37 cancer. *Aging Male.* 2005;8(3-4):207-212.  
38
- 39 34. Clemente JC, Ursell LK, Parfrey LW, Knight R. The impact of the gut microbiota on  
40 human health: an integrative view. *Cell.* 2012;148(6):1258-1270.  
41
- 42 35. Villena J, Kitazawa H. Modulation of Intestinal TLR4-inflammatory signaling  
43 pathways by probiotic microorganisms: lessons learned from lactobacillus jensenii  
44 TL2937. *Front Immunol.* 2014;4:512.  
45
- 46 36. Kelly RS, Vander Heiden MG, Giovannucci E, Mucci LA. Metabolomic biomarkers of  
47 prostate cancer: prediction, diagnosis, progression, prognosis, and recurrence. *Cancer*  
48 *Epidemiol Biomarkers Prev.* 2016;25(6):887-906.  
49
- 50 37. Paulsen JA, Ptacek TS, Carter SJ, et al. Gut microbiota composition associated with  
51 alterations in cardiorespiratory fitness and psychosocial outcomes among breast cancer  
52 survivors. *Support Care Cancer.* 2017;25(5):1563-1570.  
53  
54  
55  
56  
57  
58  
59  
60



- 1
- 2
- 3 38. Choo JM, Leong LEX, Rogers GB. Sample storage conditions significantly influence
- 4 faecal microbiome profiles. *Sci Rep*. 2015;5(1):16350.
- 5
- 6 39. Edgar RC. UPARSE: highly accurate OTU sequences from microbial amplicon reads.
- 7 *Nat Methods*. 2013;10(10):996-998.
- 8
- 9 40. Cole JR, Wang Q, Fish JA, et al. Ribosomal Database Project: data and tools for high
- 10 throughput rRNA analysis. *Nucleic Acids Res*. 2014;42(Database issue):D633-D642.
- 11
- 12 41. Røseth AG, Fagerhol MK, Aadland E, Schjønsby H. Assessment of the neutrophil
- 13 dominating protein calprotectin in feces. A methodologic study. *Scand J*
- 14 *Gastroenterol*. 1992;27(9):793-798.
- 15
- 16 42. Talley NJ, Boyce PM, Owen BK, Newman P, Paterson KJ. Initial validation of a
- 17 bowel symptom questionnaire and measurement of chronic gastrointestinal symptoms
- 18 in Australians. *Aust N Z J Med*. 1995;25(4):302-308.
- 19
- 20 43. Kulich KR, Madisch A, Pacini F, et al. Reliability and validity of the gastrointestinal
- 21 symptom rating scale (GSRS) and quality of life in reflux and dyspepsia (QOLRAD)
- 22 questionnaire in dyspepsia: a six-country study. *Health Qual Life Outcomes*.
- 23 2008;6(1):12.
- 24
- 25 44. Blake MR, Raker JM, Whelan K. Validity and reliability of the Bristol Stool Form
- 26 Scale in healthy adults and patients with diarrhoea-predominant irritable bowel
- 27 syndrome. *Aliment Pharmacol Ther*. 2016;44(7):693-703. doi:10.1111/apt.13746.
- 28
- 29 45. Scott NW, Fayers P, Aaronson NK, et al. EORTC QLQ-C30 Reference Values
- 30 Manual. July 2008.
- 31
- 32 46. van Andel G, Bottomley A, Fosså SD, et al. An international field study of the EORTC
- 33 QLQ-PR25: a questionnaire for assessing the health-related quality of life of patients
- 34 with prostate cancer. *Eur J Cancer*. 2008;44(16):2418-2424.
- 35
- 36 47. Hart NH, Nimphius S, Spiteri T, Cochrane JL, Newton RU. Segmental
- 37 Musculoskeletal Examinations using Dual-Energy X-Ray Absorptiometry (DXA):
- 38 Positioning and Analysis Considerations. *J Sports Sci Med*. 2015;14(3):620-626.
- 39
- 40 48. Galvão DA, Taaffe DR, Cormie P, et al. Efficacy and safety of a modular multi-modal
- 41 exercise program in prostate cancer patients with bone metastases: a randomized
- 42 controlled trial. *BMC Cancer*. 2011;11(1):517.
- 43
- 44 49. Galvão DA, Spry N, Denham J, et al. A multicentre year-long randomised controlled
- 45 trial of exercise training targeting physical functioning in men with prostate cancer
- 46 previously treated with androgen suppression and radiation from TROG 03.04
- 47 RADAR. *Eur Urol*. 2014;65(5):856-864.
- 48
- 49 50. Borg G. *Borg's Perceived Exertion and Pain Scales*. Champaign, IL: Human Kinetics;
- 50 1998.
- 51
- 52 51. De Roover K, Ceulemans E, Timmerman ME. How to perform multiblock component
- 53 analysis in practice. *Behav Res Methods*. 2012;44(1):41-56.
- 54
- 55
- 56
- 57
- 58
- 59
- 60

- 1  
2  
3 52. Tenenhaus A, Tenenhaus M. Regularized generalized canonical correlation analysis  
4 for multiblock or multigroup data analysis. *European Journal of Operational*  
5 *Research*. 2014;238(2):391-403.  
6  
7 53. Allen JM, Mailing LJ, Cohrs J, et al. Exercise training-induced modification of the gut  
8 microbiota persists after microbiota colonization and attenuates the response to  
9 chemically-induced colitis in gnotobiotic mice. *Gut Microbes*. 2018;9(2):115-130.  
10  
11 54. Harley ITW, Karp CL. Obesity and the gut microbiome: Striving for causality. *Mol*  
12 *Metab*. 2012;1(1-2):21-31.  
13  
14 55. Focht BC, Lucas AR, Grainger E, et al. Effects of a group-mediated exercise and  
15 dietary intervention in the treatment of prostate cancer patients undergoing androgen  
16 deprivation therapy: results from the IDEA-P trial. *Ann Behav Med*. 2018;23(32):8146.  
17  
18 56. Grosicki GJ, Fielding RA, Lustgarten MS. Gut microbiota contribute to age-related  
19 changes in skeletal muscle size, composition, and function: biological basis for a gut-  
20 muscle axis. *Calcif Tissue Int*. 2018;102(4):433-442.  
21  
22 57. Claesson MJ, Jeffery IB, Conde S, et al. Gut microbiota composition correlates with  
23 diet and health in the elderly. *Nature* 2011 472:7341. 2012;488(7410):178-184.  
24  
25 58. van Tongeren SP, Slaets JPJ, Harmsen HJM, Welling GW. Fecal microbiota  
26 composition and frailty. *Appl Environ Microbiol*. 2005;71(10):6438-6442.  
27  
28 59. Costamagna D, Costelli P, Sampaolesi M, Penna F. Role of inflammation in muscle  
29 homeostasis and myogenesis. *Mediators Inflamm*. 2015;2015(6):805172-14.  
30  
31  
32  
33  
34  
35  
36  
37  
38  
39  
40  
41  
42  
43  
44  
45  
46  
47  
48  
49  
50  
51  
52  
53  
54  
55  
56  
57  
58  
59  
60

1  
2  
3  
4  
5  
6  
7  
8  
9  
10  
11  
12  
13  
14  
15  
16  
17  
18  
19  
20  
21  
22  
23  
24  
25  
26  
27  
28  
29  
30  
31  
32  
33  
34  
35  
36  
37  
38  
39  
40  
41  
42  
43  
44  
45  
46  
47  
48  
49  
50  
51  
52  
53  
54  
55  
56  
57  
58  
59  
60

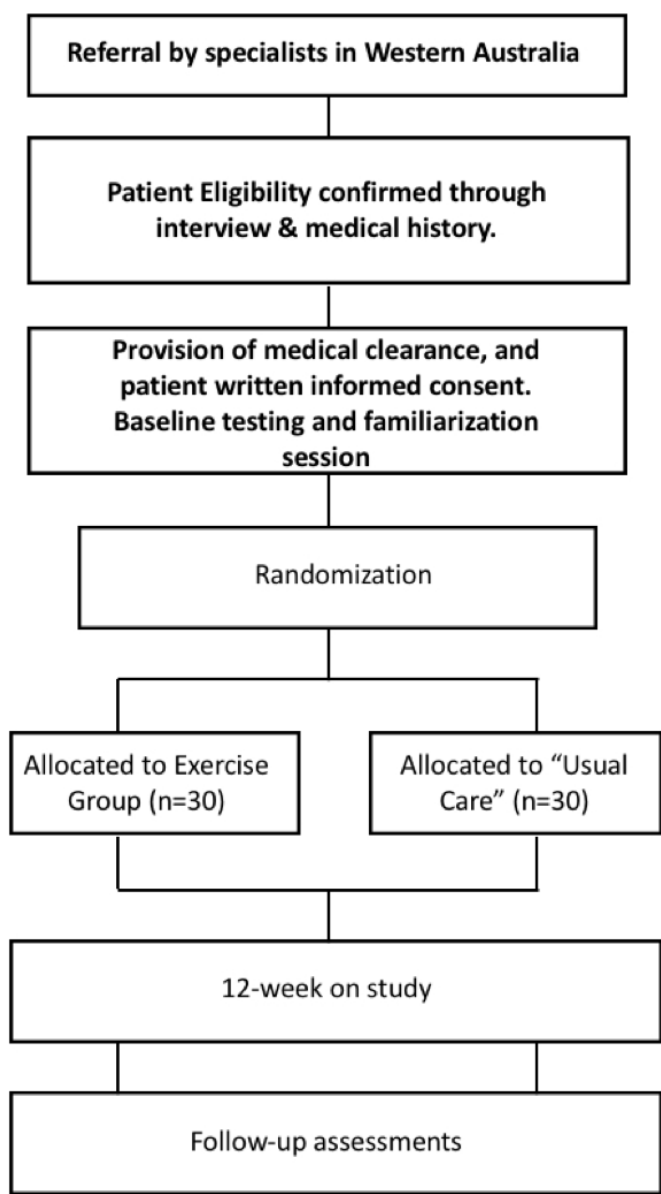

Figure 1. CONSORT (Consolidated Standards of Reporting Trials) diagram

Table 1. Schedule of assessments at baseline and post intervention

| Measures                          | Baseline | Post intervention |
|-----------------------------------|----------|-------------------|
| Medical history                   | x        |                   |
| Gut health (24-hour stool sample) | x        | x                 |
| Dietary behaviour (DQES)          | x        | x                 |
| Blood biomarkers                  | x        | x                 |
| Cancer specific quality of life   |          |                   |
| EORTC-QLQ-C30                     | x        | x                 |
| EORTC-PR-25                       | x        | x                 |
| Body composition (DXA)            | x        | x                 |
| Muscle strength (1RM)             | x        | x                 |
| Aerobic fitness (400m)            | x        | x                 |
| Physical function tests           | x        | x                 |

DQES: Dietary Questionnaire for Epidemiological Studies; EORTC: European Organization for Research and Treatment of Cancer.

# BMJ Open

## Does exercise impact gut microbiota composition in men receiving androgen deprivation therapy for prostate cancer? A single-blinded, two-armed, randomised controlled trial.

|                                 |                                                                                                                                                                                                                                                                                                                                                                                                                                                                                                                                                                                                                                                                                                                                                                                                                                                                                                                                                                                                                                                                                                                                                                                                                                                                                                                                                                                                                                                                                                                                                                                                                                                             |
|---------------------------------|-------------------------------------------------------------------------------------------------------------------------------------------------------------------------------------------------------------------------------------------------------------------------------------------------------------------------------------------------------------------------------------------------------------------------------------------------------------------------------------------------------------------------------------------------------------------------------------------------------------------------------------------------------------------------------------------------------------------------------------------------------------------------------------------------------------------------------------------------------------------------------------------------------------------------------------------------------------------------------------------------------------------------------------------------------------------------------------------------------------------------------------------------------------------------------------------------------------------------------------------------------------------------------------------------------------------------------------------------------------------------------------------------------------------------------------------------------------------------------------------------------------------------------------------------------------------------------------------------------------------------------------------------------------|
| Journal:                        | <i>BMJ Open</i>                                                                                                                                                                                                                                                                                                                                                                                                                                                                                                                                                                                                                                                                                                                                                                                                                                                                                                                                                                                                                                                                                                                                                                                                                                                                                                                                                                                                                                                                                                                                                                                                                                             |
| Manuscript ID                   | bmjopen-2018-024872.R1                                                                                                                                                                                                                                                                                                                                                                                                                                                                                                                                                                                                                                                                                                                                                                                                                                                                                                                                                                                                                                                                                                                                                                                                                                                                                                                                                                                                                                                                                                                                                                                                                                      |
| Article Type:                   | Protocol                                                                                                                                                                                                                                                                                                                                                                                                                                                                                                                                                                                                                                                                                                                                                                                                                                                                                                                                                                                                                                                                                                                                                                                                                                                                                                                                                                                                                                                                                                                                                                                                                                                    |
| Date Submitted by the Author:   | 15-Jan-2019                                                                                                                                                                                                                                                                                                                                                                                                                                                                                                                                                                                                                                                                                                                                                                                                                                                                                                                                                                                                                                                                                                                                                                                                                                                                                                                                                                                                                                                                                                                                                                                                                                                 |
| Complete List of Authors:       | <p>Newton, Robert; Edith Cowan University, Exercise Medicine Research Institute; University of Queensland, School of Human Movement and Nutrition Sciences</p> <p>Christophersen, Claus; Edith Cowan University, School of Medical and Health Sciences; Curtin University - Perth City Campus, School of Molecular &amp; Life Science</p> <p>Fairman, Ciaran; Edith Cowan University, Exercise Medicine Research Institute; Edith Cowan University, School of Medical and Health Sciences</p> <p>Hart, Nicolas; Edith Cowan University, Exercise Medicine Research Institute; University of Notre Dame Australia, Institute for Health Research</p> <p>Taaffe, Dennis; Edith Cowan University, Exercise Medicine Research Institute; University of Queensland, School of Human Movement and Nutrition Sciences</p> <p>Broadhurst, David; Edith Cowan University, School of Science; Edith Cowan University, Centre for Integrative Metabolomics and Computational Biology</p> <p>Devine, Amanda; Edith Cowan University, School of Medical and Health Sciences; Edith Cowan University, Centre for Integrative Metabolomics and Computational Biology</p> <p>Chee, Raphael ; Edith Cowan University, Exercise Medicine Research Institute; Genesis CancerCare, Radiation Oncology</p> <p>Tang, Colin; Sir Charles Gairdner Hospital, Department of Radiation Oncology</p> <p>Spry, Nigel; Genesis CancerCare, Joondalup, WA, Australia; Edith Cowan University, Exercise Medicine Research Institute</p> <p>Galvão, Daniel; Edith Cowan University, Exercise Medicine Research Institute; Edith Cowan University, School of Medical and Health Sciences</p> |
| <b>Primary Subject Heading</b>: | Sports and exercise medicine                                                                                                                                                                                                                                                                                                                                                                                                                                                                                                                                                                                                                                                                                                                                                                                                                                                                                                                                                                                                                                                                                                                                                                                                                                                                                                                                                                                                                                                                                                                                                                                                                                |
| Secondary Subject Heading:      | Oncology, Rehabilitation medicine, Sports and exercise medicine                                                                                                                                                                                                                                                                                                                                                                                                                                                                                                                                                                                                                                                                                                                                                                                                                                                                                                                                                                                                                                                                                                                                                                                                                                                                                                                                                                                                                                                                                                                                                                                             |
| Keywords:                       | Inflammation, Bowel, Faecal, Resistance, aerobic, metabolomics                                                                                                                                                                                                                                                                                                                                                                                                                                                                                                                                                                                                                                                                                                                                                                                                                                                                                                                                                                                                                                                                                                                                                                                                                                                                                                                                                                                                                                                                                                                                                                                              |
|                                 |                                                                                                                                                                                                                                                                                                                                                                                                                                                                                                                                                                                                                                                                                                                                                                                                                                                                                                                                                                                                                                                                                                                                                                                                                                                                                                                                                                                                                                                                                                                                                                                                                                                             |

1  
2  
3  
4  
5  
6  
7  
8  
9  
10  
11  
12  
13  
14  
15  
16  
17  
18  
19  
20  
21  
22  
23  
24  
25  
26  
27  
28  
29  
30  
31  
32  
33  
34  
35  
36  
37  
38  
39  
40  
41  
42  
43  
44  
45  
46  
47  
48  
49  
50  
51  
52  
53  
54  
55  
56  
57  
58  
59  
60

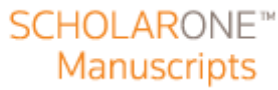

1  
2  
3  
4  
5  
6  
7  
8  
9  
10  
11  
12  
13  
14  
15  
16  
17  
18  
19  
20  
21  
22  
23  
24  
25  
26  
27  
28  
29  
30  
31  
32  
33  
34  
35  
36  
37  
38  
39  
40  
41  
42  
43  
44  
45  
46  
47  
48  
49  
50  
51  
52  
53  
54  
55  
56  
57  
58  
59  
60

## Does exercise impact gut microbiota composition in men receiving androgen deprivation therapy for prostate cancer? A single-blinded, two-armed, randomised controlled trial.

Robert U. Newton, PhD <sup>1,2,3</sup>; Claus T. Christophersen, PhD <sup>2,4</sup>; Ciaran M. Fairman, PhD <sup>1,2</sup>; Nicolas H. Hart, PhD <sup>1,2,5</sup>; Dennis R. Taaffe, PhD, DSc, MPH <sup>1,2,3</sup>; David I. Broadhurst, PhD <sup>6,7</sup>; Amanda Devine, PhD <sup>2,7</sup>; Raphael Chee MBBS <sup>1,2,8,9</sup>; Colin I. Tang MBBS <sup>10</sup>; Nigel A. Spry, MD PhD <sup>1,2,8,11</sup>; Daniel A. Galvão, PhD <sup>1,2</sup>

### From:

<sup>1</sup> Exercise Medicine Research Institute, Edith Cowan University, Perth, W.A., Australia;

<sup>2</sup> School of Medical and Health Sciences, Edith Cowan University, Perth, W.A., Australia;

<sup>3</sup> School of Human Movement and Nutrition Sciences, University of Queensland, Brisbane, Q.L.D, Australia;

<sup>4</sup> School of Molecular & Life Sciences, Curtin University, W.A., Australia;

<sup>5</sup> Institute for Health Research, University of Notre Dame Australia, Perth, W.A., Australia;

<sup>6</sup> School of Science, Edith Cowan University, Perth, W.A., Australia;

<sup>7</sup> Centre for Integrative Metabolomics and Computational Biology, Edith Cowan University, Perth, W.A., Australia;

<sup>8</sup> Radiation Oncology, Genesis CancerCare, Perth, W.A., Australia;

<sup>9</sup> School of Surgery, University of Western Australia, Perth, W.A., Australia;

<sup>10</sup> Department of Radiation Oncology, Sir Charles Gairdner Hospital, Perth, W.A., Australia;

<sup>11</sup> School of Medicine and Pharmacology, University of Western Australia, Perth, W.A., Australia

### Corresponding Author:

Prof. Robert U. Newton – PhD, AEP, CSCS\*D, FESSA, FNSCA.

Exercise Medicine Research Institute

Edith Cowan University, 270 Joondalup Drive, Joondalup

Perth, Western Australia, Australia – 6027.

Ph: +61 8 6304 3443

Fax: +61 8 6304 2499

Email: [r.newton@ecu.edu.au](mailto:r.newton@ecu.edu.au)

**Short Title:** *Exercise and Gut Microbiota Composition.*

**Key Words:** inflammation, bowel, faecal, resistance, aerobic, metabolomics

**Word Count:** 4233

## ABSTRACT

**Introduction:** A potential link exists between prostate cancer disease and treatment and increased inflammatory levels from gut dysbiosis.' This study aims to examine if exercise favourably alters gut microbiota in men receiving androgen deprivation therapy (ADT) for prostate cancer. Specifically, this study will explore whether: 1) exercise improves the composition of gut microbiota and increases the abundance of bacteria associated with health-promotion; and 2) whether gut health correlates with favourable inflammatory status, bowel function, continence, and nausea among patients participating in the exercise intervention.

**Methods and Analysis:** A single-blinded, two-armed, randomised controlled trial will explore the influence of a 3-month exercise program (3 days per week) for men with high risk localised prostate cancer receiving ADT. Sixty patients will be randomly assigned to either exercise intervention or usual care. The primary endpoint (gut health and function assessed via fecal samples) and secondary endpoints (self-reported quality of life via standardised questionnaires, blood biomarkers, body composition and physical fitness) will be measured at baseline and following the intervention. A variety of statistical methods will be used to understand the covariance between microbial diversity and metabolomics profile across time and intervention. An intention-to-treat approach will be utilised for the analyses with multiple imputations followed by a secondary sensitivity analysis to ensure data robustness using a complete cases approach.

**Ethics and Dissemination:** Ethics approval was obtained from the Human Research Ethics Committee of Edith Cowan University (ID: 19827 NEWTON). Findings will be reported in peer-reviewed publications and scientific conferences in addition to working with national support groups to translate findings for the broader community. If exercise is shown to result in favourable changes in gut microbial diversity, composition and metabolic profile, and reduce gastrointestinal complications in prostate cancer patients receiving ADT, this study will form the basis of a future phase III trial.

**Trial Registration:** ANZCTR-12618000280202

**Registration Details:** 22<sup>nd</sup> February, 2018 – (prospectively registered).



### Strengths and Limitations

- This trial comprises a comprehensive analysis of gut microbiome in individuals with prostate cancer, addressing a significant and increasingly emergent issue in this area.
- A two-armed, randomised controlled trial design to examine proof of concept and provide effect sizes to design subsequent appropriately powered trials.
- Lack of follow-up past 13 weeks prohibits any assessment of sustainability of effects.
- The inclusion criteria prevents generalizability to the other types of cancer.
- Diet and physical activity (outside of the intervention) will not be tracked and are limitations of the current design.

For peer review only

## INTRODUCTION

Gut microbiota play a fundamental role in protection from pathogens, in the induction and function of the immune system, and in the promotion of digestion and absorption of dietary nutrients for energy production.<sup>1,2</sup> Indeed, perturbations of the composition and function of gut microbiota can cause gastrointestinal (GI) complications, and contribute to the pathogenesis of metabolism and disease processes such as inflammation, infection and tumours.<sup>3-6</sup>

Androgen deprivation therapy (ADT) is extensively used as a neoadjuvant, adjuvant and/or standalone treatment for men with prostate cancer,<sup>6</sup> however, survivors are burdened with persistent adverse effects of ADT including GI complications.<sup>7-11</sup> Despite a paucity of research into the mechanisms associated with GI diseases in prostate cancer survivors, it is hypothesised that a dysbiotic composition of the gut microbiome may mediate negative outcomes of GI complications associated with prostate cancer.<sup>12-15</sup> Indeed, results from murine models demonstrate that castration and antiandrogens can affect the composition of gut microbiota.<sup>16,17</sup> The complex, dynamic interaction between sex hormones and gut microbiome is still poorly understood.<sup>18</sup> Nevertheless, Markle et al.<sup>19</sup> demonstrated that elevated levels of testosterone in female mice results in favourable changes in microbiota, metabolomics, and inflammation, lending potential support for the role of ADT in adverse changes to gut microbiota.<sup>19,20</sup> To address gut dysbiosis, especially for those with cancer, recent interventions have focused on the use of probiotics or prebiotics to alleviate symptoms,<sup>[2]</sup> indicating that the manipulation of gut microbiota could be a viable therapeutic strategy for men with prostate cancer.<sup>21,22</sup>

Perhaps unsurprisingly, emerging evidence indicates that exercise may exert a positive effect on gut microbial composition.<sup>2 23</sup> In non-cancer cohorts, a link between exercise and gut microbial diversity, composition and beneficial metabolite production has been illustrated.<sup>24 25</sup> Of note, the ratio of Firmicutes to Bacteroidetes phyla is of particular importance, with obese individuals having a higher Firmicutes to Bacteroidetes ratio which is indicative of poorer gut health.<sup>26 27</sup> Importantly, it has been consistently demonstrated that men on ADT experience considerable unfavourable shifts in body composition, indicated by a significant loss of lean body mass coupled with an increase in fat mass.<sup>28-30</sup> Consequently, men on ADT may be at a heightened risk for this altered ratio of Firmicutes to Bacteroidetes. The shift in relative abundances of these phyla is suggested to result in an increased ability to harvest energy from food and promote low-grade inflammation.<sup>31</sup> Whereas, a microbiota in homeostasis and the presence of *Lactobacillus* and *Bifidobacterium* can exert anti-inflammatory effects at local and systemic levels, indicating a potential link between the gut microbiota health and inflammatory status.<sup>32</sup>

Metabolites are molecules that have critical roles in cellular metabolism, energy production and storage, apoptosis and signal transduction, and are affected by diet, exercise and gut microbiota amongst others. Indeed, the metabolomic profile has been suggested to be indicative of disease state in cancer and identified as a potential biomarker of the development and progression of prostate cancer.<sup>33</sup> Consequently, an exploration of the relationships between changes in gut microbiota composition, metabolomic profile, inflammatory status and bowel function could have important clinical implications through enhancing positive exercise-induced effects on these outcomes through the manipulation of the composition of gut microbiota. Although the potential for exercise to modulate gut microbiota is promising, a paucity of research in the area exists, particularly in individuals at risk for gut dysbiosis. As

1  
2  
3 such, no prior investigation has been conducted to determine whether gut microbiota  
4  
5 composition is influenced by exercise in prostate cancer survivors.<sup>34</sup>  
6  
7  
8  
9

10 The aim of this exploratory study is to determine the effect of exercise medicine on gut  
11  
12 microbiota and its metabolome in men receiving ADT for prostate cancer (PCa). Specifically,  
13  
14 we will explore whether: 1) exercise improves composition of the gut microbiota and increases  
15  
16 abundance of health-promoting bacterial species, thereby driving an advantageous faecal  
17  
18 metabolomic profile, and 2) improved gut health correlates with favourable inflammatory  
19  
20 status, bowel function, continence, nausea and appetite among patients participating in the  
21  
22 exercise intervention. It is hypothesised that the exercise program will result in favourable  
23  
24 changes in the composition of gut microbiota, and that these changes will be correlated with  
25  
26 improvements in inflammatory status, bowel function and other GI issues. This study will serve  
27  
28 to provide a better understanding of whether the gut microbiota and its metabolites can be  
29  
30 modulated by exercise as a potential therapeutic target that can be offered for prostate cancer  
31  
32 patients on ADT.  
33  
34  
35  
36  
37  
38

## 39 **METHODS**

### 40 41 **Study Design**

42 This is a single-blinded (investigators blinded to group allocation), randomised controlled trial,  
43  
44 designed to measure the impact of a supervised exercise medicine intervention on gut  
45  
46 microbiota and its metabolome of prostate cancer patients receiving ADT. An ‘exercise’ group  
47  
48 will receive a 12-week supervised exercise program comprising aerobic and resistance exercise  
49  
50 undertaken three times per week. A ‘usual care’ group will continue to receive usual medical  
51  
52 care during the trial. The ‘usual care’ group will be offered an exercise program following their  
53  
54  
55  
56  
57  
58  
59  
60

1  
2  
3 control period to minimise study contamination and to reduce patient withdrawal and loss to  
4  
5 follow-up.  
6  
7  
8  
9

## 10 **Participants**

11  
12 Sixty men (n=60) with high risk localised prostate cancer, defined by the National  
13 Comprehensive Cancer Network as T3a disease, Gleason  $\geq 8$ , or PSA  $\geq 20$ ,<sup>35</sup> who are currently  
14 on ADT (and expected to remain on ADT for the next three months) are eligible to enrol in this  
15 study and will be randomised to 'exercise' or 'usual care'. ADT can be achieved with either  
16 luteinizing hormone-releasing hormone (LHRH) agonists or LHRH antagonists, or a  
17 combination of the two. It is also acceptable for patients to receive no more than 4 weeks of  
18 anti-androgen at the initiation of their ADT to prevent flare from testosterone surge. Patients  
19 must be on continuous ADT during the study period.  
20  
21  
22  
23  
24  
25  
26  
27  
28  
29  
30  
31  
32

33 Participants will be excluded if they have any nodal, visceral or bone metastases (N1 or M1  
34 disease); are being treated for other cancers; previously received or currently receiving  
35 chemotherapy; currently receiving radiation therapy or any non-approved experimental  
36 therapies; and/or previously had any prior gastrointestinal surgery. Patients will also be  
37 excluded if they have taken antibiotics, prebiotics, probiotics, nutritional or ergogenic  
38 compliments or supplements within 3 months prior to study enrolment; have recently had a  
39 prostatectomy, orchiectomy, or received radiation therapy within 12 months prior to study  
40 enrolment; have any physical, mental or other contraindications to exercise; and/or cannot (or  
41 have difficulty) understanding English. Participants will be excluded if they currently engage  
42 in regular, structured physical activity (aerobic or resistance training for 2 or more times per  
43 week in the previous 3 months). All participants must receive medical clearance from their  
44  
45  
46  
47  
48  
49  
50  
51  
52  
53  
54  
55  
56  
57  
58  
59  
60

1  
2  
3 managing physician to be eligible to enrol. Additionally, all participants will be asked to provide  
4 informed consent prior to the start of any study activities.  
5  
6  
7  
8  
9

## 10 **Recruitment**

11  
12 Men with localised or locally advanced prostate cancer, who are currently receiving ADT, will  
13 be recruited by invitation of their attending specialist (i.e. urologist or radiation oncologist),  
14 who will provide clinically eligible patients with a study information sheet and referral to the  
15 study coordinator. If patients are interested in participation, and their eligibility is confirmed,  
16 they will receive an informed consent document to read and sign in the presence of a study  
17 investigator and/or clinical research coordinator prior to completing baseline measures and  
18 randomisation. Figure 1 outlines the process of referrals, recruitment and enrolment in the trial.  
19  
20  
21  
22  
23  
24  
25  
26  
27

28 - **Insert Figure 1 here** -  
29  
30  
31  
32

## 33 **Randomisation**

34  
35 Prostate cancer patients will be randomly allocated in a ratio of 1:1 to two study arms: exercise  
36 or usual care, stratified by age ( $\leq 60$  years,  $>60$  years), time on ADT ( $\leq 6$  months,  $>6$  months),  
37 and prior prostatectomy or radiation therapy (Yes, No) for approximate balance between  
38 groups in order to mitigate confounding factors pertaining to variations due to ageing (i.e.  
39 differences in physical function, sarcopenia, osteopenia and osteoporosis) and to account for  
40 variations in treatment. All patients will be required to be on ADT prior to, and during the  
41 study, as per standard of care for this patient population. A research officer with no patient  
42 contact will be responsible for the randomisation of patients into groups using a computer-  
43 generated random assignment program. Study investigators and the exercise physiologists  
44 conducting testing procedures will be blinded to group allocation. Only exercise physiologists  
45  
46  
47  
48  
49  
50  
51  
52  
53  
54  
55  
56  
57  
58  
59  
60

who are not part of the research team will be permitted to deliver the exercise intervention to participants in order to maintain integrity of the blinding process.

## Measurements

Table 1 outlines the primary and secondary endpoints that will be undertaken at baseline (Week 0), and post-intervention (Week 13). All procedures and assessment tools have proven validity and reliability and are used widely throughout clinical research.

Table 1. Schedule of assessments at baseline and post intervention

| Measures                          | Baseline | Post intervention |
|-----------------------------------|----------|-------------------|
| Medical history                   | x        |                   |
| Gut health (24-hour stool sample) | x        | x                 |
| Dietary behaviour (DQES)          | x        | x                 |
| Blood biomarkers                  | x        | x                 |
| Cancer specific quality of life   |          |                   |
| EORTC-QLQ-C30                     | x        | x                 |
| EORTC-PR-25                       | x        | x                 |
| Body composition (DXA)            | x        | x                 |
| Muscle strength (1RM)             | x        | x                 |
| Aerobic fitness (400m)            | x        | x                 |
| Physical function tests           | x        | x                 |

DQES: Dietary Questionnaire for Epidemiological Studies; EORTC: European Organization for Research and Treatment of Cancer.

## ***Primary Endpoint***

### *Gut Health and Dysbiosis*

Gut health will be assessed through the provision of a 24-hour collection of stool sample(s), subsequently examined and analysed for microbial composition (using bacterial DNA), bacterial metabolites and for faecal calprotectin. Briefly, participants will be provided with a 24-h collection kit for collection of all bowel movements within that time. The kit includes a high-performance cooler bag (Techni Ice), 2 gel ice packs (Techni Ice), collection bags, Bristol stool chart to classify stool and instructions. The cooler bag has been tested in our laboratory to maintain temperature at 4°C for 24-36 hours, and 4°C has been shown to not significantly alter faecal microbiota diversity or composition.<sup>36</sup> In addition, we have also showed that there is no significant difference in faecal short chain fatty acid (SCFA) levels between cool temperature storage and immediate freezing of the stool sample at -20°C (data not shown). Samples will be returned to the laboratory within 12-24 hours following collection and stored at -80 °C in a biomedical freezer (Forma 88700 ULT; Thermo Fisher Scientific Inc., Waltham, MA, USA) until they are homogenised (combined if >1 sample over the 24h) and partitioned into aliquots for analysis.

To extract microbial DNA, samples will be lysed using both mechanical and enzymatic breakdown of the bacterial cell membranes and the DNA extracted using the QIAamp PowerFecal DNA kit (Qiagen; Hilden, Germany). Microbiome signatures will be generated using the Illumina MiSeq platform using barcoded primer, V4 (515-806). Quality control samples are included in the analysis from sample collection to sequence analysis and all samples will be individually screened for PCR efficiency prior to building sequence libraries. For building the sequence libraries, a PCR-free ligation protocol will be deployed with sample barcodes that are never reused in our laboratory. Samples will be sequenced to a depth of



1  
2  
3 minimum 30,000 reads, which is sufficient to identify microbes to a genus/species level. qPCR  
4  
5 will be used to verify shifts observed in the sequence data and will therefore be determined  
6  
7 post-analysis of the 16S rRNA gene data. This will provide a detailed picture of longitudinal  
8  
9 changes in gut microbial community structure with treatment and following exercise.  
10  
11  
12

13  
14 Sequence read quality will be initially assessed with FASTQC before demultiplexing and  
15  
16 preprocessing by Shitanda<sup>37</sup> and/or GHAPv2. ClustalW will be used for removal of all non-  
17  
18 biological sequences<sup>38</sup>. DADA2 is then used for quality filtering, error correction, exact  
19  
20 sequence variants (ASVs) picking<sup>39</sup>. A trained naïve Bayes classifier then assigns ASVs to  
21  
22 genus/species against a curated database of microbial reference sequences such as the RDP<sup>40</sup>  
23  
24 or SILVA.  
25  
26  
27  
28  
29

30  
31 The faecal metabolome contains over 6,000 known endogenous and exogenous metabolites,  
32  
33 comprised of many classes, each with unique chemical properties; thus no single analytical  
34  
35 platform can be used to measure the entire metabolome in a single assay. Untargeted metabolite  
36  
37 profiles (>2,000 metabolite features) will be measured in faecal samples using high-throughput  
38  
39 mass-spectrometry technologies consisting of 2 complementary analytical platforms in 6  
40  
41 modes of operation: GC-QTOF MS (EI & CI modes) and LC-QTOF MS (Reverse Phase and  
42  
43 HILIC Chromatography with both positive & negative ionisation modes). Resulting data will  
44  
45 provide a comprehensive systems overview of metabolome disruption of the gut microbiota  
46  
47 due to prostate cancer and ADT, as well as alterations resulting from the exercise intervention.  
48  
49 All analyses will be performed at the Centre for Integrative Metabolomics & Computational  
50  
51 Biology (CiMCB; Edith Cowan University, Perth, Australia). Additional targeted analysis  
52  
53 methods will be used for accurate quantification of short chain fatty acids; Formate, Acetate,  
54  
55  
56  
57  
58  
59  
60

1  
2  
3 Propionate, Butyrate, Isobutyrate, Valerate, and Isovalerate metabolites. Faecal calprotectin  
4 will also be measured as a biomarker of inflammation to monitor gut inflammation<sup>41</sup>.  
5  
6  
7  
8  
9

## 10 ***Secondary Endpoints***

### 11 *Dietary Behaviour*

12  
13  
14 Habitual dietary intake will be assessed using the Dietary Questionnaire for Epidemiological  
15 Studies (DQES, Version 2.0; Cancer Council of Victoria, Melbourne, Australia) which is a  
16 modified food frequency questionnaire (FFQ) relevant to cancer populations. A research  
17 assistant will supervise the completion of the DQES and use food models and charts, metric  
18 cups and spoons to increase accuracy. All participants will be instructed to maintain their  
19 habitual dietary patterns throughout the study. DQES data will be collated and batch analysed  
20 at the conclusion of the study by the Nutritional Assessment Office (Cancer Council of  
21 Victoria, Melbourne, Australia). Dietary analysis will include food item frequency and a  
22 comprehensive nutrient intake analysis.  
23  
24  
25  
26  
27  
28  
29  
30  
31  
32  
33  
34  
35  
36  
37

### 38 *Biomarkers*

39  
40 Fasted blood samples will be collected and analysed commercially by an accredited National  
41 Association of Testing Authorities laboratory (Australian Clinical Labs, Perth, Australia) for  
42 glucose, high-sensitivity C-reactive protein (CRP), Tumor necrosis factor-alpha (TNF- $\alpha$ ),  
43 interleukin-6 (IL-6), cholesterol (total, high-density lipoprotein, low-density lipoprotein),  
44 testosterone and prostate specific antigen (PSA). Additional serum (SST, 8ml) and plasma  
45 (EDTA, 9ml) samples will be collected at baseline and post-intervention visits by a certified  
46 phlebotomist, and will be processed and stored in a -80°C biomedical freezer (Forma 88700  
47 ULT; Thermo Fisher Scientific Inc., Massachusetts, USA) for subsequent metabolomics  
48 analysis at the CiMCB. For participants that provide consent, the samples will be stored for a  
49  
50  
51  
52  
53  
54  
55  
56  
57  
58  
59  
60

1  
2  
3 duration of 5 years. We will be pursuing other research studies in advanced cancer patients,  
4 and this de-identified blood sample data may be of use to gain further insights and  
5 comparisons. For participants who do not provide consent for future storage (but do provide  
6 consent for this study), we will destroy any left-over samples following the analysis required  
7 for this study (within 6 months from time of patient enrolment).  
8  
9  
10  
11  
12  
13

### 14 15 16 17 *Clinical Data*

18  
19 Prostate cancer participant medical history, including prostate cancer diagnosis (i.e. Gleason  
20 score, stage of cancer, months since diagnosis, treatment history and time on ADT),  
21 comorbidities (i.e. hypertension, osteoarthritis, and others), concomitant medications (i.e.  
22 opioids, beta-blockers, anti-hypertensives, blood cholesterol and others), and other diagnosed  
23 chronic diseases (i.e. osteoporosis, diabetes, cardiovascular disease and others) will be sourced  
24 from patient medical records. Further, information pertaining to any related history of bowel  
25 symptoms<sup>42</sup>, gastrointestinal symptoms<sup>43</sup>, and other bowel-related conditions (Bristol Stool  
26 Chart)<sup>44</sup> will also be obtained.  
27  
28  
29  
30  
31  
32  
33  
34  
35  
36  
37  
38  
39

### 40 *Quality of life, bowel function, continence, nausea & appetite.*

41  
42 Cancer-specific quality of life indices will be measured using the European Organisation for  
43 Research and Treatment of Cancer Quality of Life Questionnaire Core 30 (EORTC-QLQ-  
44 C30),<sup>45</sup> assessing five functional scales (physical, role, emotional, cognitive, and social  
45 functioning), three symptom scales (fatigue, pain, nausea and vomiting), a global health scale,  
46 and six single items (dyspnea, insomnia, appetite loss, constipation, diarrhoea and financial  
47 difficulty). Prostate cancer specific quality of life indices will be measured using the EORTC-  
48 Prostate Cancer Module (EORTC QLQ-PR25),<sup>46</sup> assessing urinary symptoms, bowel  
49 symptoms, treatment-related symptoms and sexual functioning.  
50  
51  
52  
53  
54  
55  
56  
57  
58  
59  
60

### *Anthropometric and Body Composition Measures*

Stature will be recorded to the nearest 1 cm using a wall-mounted stadiometer (Model 222, Seca, Hamburg, DE), with body mass recorded to the nearest 0.1 kg using an electronic scale (AE Adams CPW Plus-200, Adam Equipment, Connecticut, USA). Whole body fat percentage, fat mass and lean mass will be measured using Dual-energy X-ray Absorptiometry (DXA; Horizon A, Hologic Inc., Massachusetts, USA), with whole-body and appendicular segmentations generated in accordance with Hart and colleagues.<sup>47</sup>

### *Physical Fitness*

A battery of standard tests will be used to assess physical fitness, including: 1) muscle strength, using one-repetition maximum (1RM) tests for chest press, seated row and leg press exercises; 2) aerobic fitness, using the 400-metre walk test; and 3) physical function, using the timed up and go, 6-metre walk test (normal, fast and backward) and repeated chair rise.<sup>48 49</sup>

### **Exercise Program**

Patients assigned to the exercise arm will attend three clinic-based supervised exercise sessions each week for 12 weeks consisting of moderate-to-high intensity resistance and aerobic exercise (interval and continuous). Each session will take approximately 60 minutes, including warm-up and cool-down, and will be supervised by accredited exercise physiologists (AEP, Exercise and Sports Science Australia). The exercise program is designed to provide optimal stimulus to the cardiorespiratory and neuromuscular systems while maximising safety, compliance and retention, thus will be tailored, progressive, periodised and autoregulated in collaboration with the patient (i.e. adjusted based on the patient's presentation at each session).

1  
2  
3  
4  
5  
6  
7  
8  
9  
10  
11  
12  
13  
14  
15  
16  
17  
18  
19  
20  
21  
22  
23  
24  
25  
26  
27  
28  
29  
30  
31  
32  
33  
34  
35  
36  
37  
38  
39  
40  
41  
42  
43  
44  
45  
46  
47  
48  
49  
50  
51  
52  
53  
54  
55  
56  
57  
58  
59  
60

Resistance exercise will be prescribed using repetition maximums (RM), where patients will be required to perform 6-8 different resistance exercises using major muscle groups, at 6-12 RM (the maximal weight that can be lifted 6 to 12 times each set, equivalent to ~60-85% of 1RM) for 3-4 sets per exercise to achieve moderate-to-high intensity and volume. Aerobic exercise will include 20 to 30 minutes of moderate-to-vigorous intensity activity (equating to ~60-85% of estimated maximum heart rate; or a rating of perceived exertion (RPE) between 6-8 using the BORG 10 point scale<sup>50</sup>) involving a variety of modes including walking, jogging, cycling or rowing, using treadmills and/or stationary ergometers. Aerobic intensity will be monitored using heart rate monitors (Polar M400, H10 Sensor, Polar Electro, NSW, Australia) and an RPE chart for assessment. Patients will also be encouraged to perform additional aerobic exercise (such as brisk walking), outside of their supervised exercise clinic visits, progressing toward accruing a volume of activity consistent with national guidelines for health (i.e. 150 minutes of physical activity, or a further ~60-90 minutes self-managed). Participants will be provided log books to detail aerobic activity, which will be reviewed in the clinic each week. Flexibility exercises for all joints considered important for function and for all muscles engaged during the session will be provided during the cool-down phase of each exercise session.

### Statistical Analysis

These sample sizes (n=30 per group, totalling n=60) have been chosen to determine a moderate standardised effect ( $d = 0.8$ ) for the primary and most secondary outcome measures (alpha=0.05).

A variety of statistical methods will be used to understand the covariance between microbial diversity and metabolomics profile across time and intervention, including using classical

1  
2  
3 parametric and nonparametric univariate statistical methods (e.g. repeated measure ANOVA),  
4  
5 as well as multivariate projection models (such as Principal Components Analyses, and Partial  
6  
7 Least Squares Discriminant Analyses). The purpose of this initial stage of data analysis will be  
8  
9 to uncover latent correlated biochemical structure in the data, mapping metabolite  
10  
11 concentrations to metabolic pathways, and ultimately to determine candidate metabolic  
12  
13 signatures associated with dysregulation of the gut microbiome. The resulting metabolite  
14  
15 signatures will be integrated with quantified SCFA measurements to contextualise the results.  
16  
17 The metabolomic and metagenomic data will be integrated using latent structure projection  
18  
19 techniques including OnPLS<sup>51</sup>, Multiblock Component Analysis<sup>52</sup> and Regularized  
20  
21 Generalized Canonical Correlation Analysis (RGCCA)<sup>53</sup>, which extracts a minimal number of  
22  
23 globally predictive orthogonal latent components that exhibit maximal covariance and  
24  
25 correlation between data blocks. This will allow us to perform metabolite functional mapping,  
26  
27 which will allow us to start unpacking the biochemical mechanism of microbiome/exercise  
28  
29 interaction.  
30  
31  
32  
33  
34  
35  
36  
37

38 Statistical analyses will also include descriptive characteristics, t-tests, effect size and two-way  
39  
40 (group x time) repeated measures ANOVA (or analysis of covariance, adjusted for baseline  
41  
42 values, time on ADT and medication change). For categorical variables, Pearson chi-square  
43  
44 will be used. Data will be examined using an intention-to-treat approach with multiple  
45  
46 imputations followed by a secondary sensitivity analysis to ensure data robustness using a  
47  
48 complete cases approach. Data will be completely de-identified, and subsequently coded in  
49  
50 order to note which group / intervention a patient received; without any ability to identify the  
51  
52 patient in any way. Any identifiable documents will be destroyed. The de-identified  
53  
54 information will be kept electronically only, in a password locked folder, on a password locked  
55  
56 computer, accessible only by the team investigators. All statistical techniques employed in this  
57  
58  
59  
60

1  
2  
3 study will be implemented using open source software (R or Python), which will be made  
4  
5 publicly available at the time of dissemination.  
6  
7  
8  
9

### 10 **Adverse Events**

11  
12 Individuals will be monitored for any adverse events during exercise testing and training and  
13  
14 will be documented accordingly. The study team has extensive experience in delivering  
15  
16 exercise specifically tailored to individuals with prostate cancer in a safe and efficacious  
17  
18 manner. The risks of adverse events are low in this study and a data monitoring/safety  
19  
20 committee has not been appointed.  
21  
22  
23  
24  
25

### 26 **Patient and Public Involvement**

27  
28 The Exercise Medicine Research Institute (EMRI) has consumer representatives (cancer  
29  
30 patients, survivors and their family members) who volunteer their time to provide input into  
31  
32 research directions and study designs. Furthermore, the study clinicians (CIT, RC) consult  
33  
34 within the major public and private hospitals in Perth, Western Australia, each with high  
35  
36 prostate cancer caseloads, thus have used patient priorities, patient experience and patient  
37  
38 preferences to help inform the development of the research questions and outcome measures,  
39  
40 while aiding the study protocol to engage participants in a respectful, ethical and impactful  
41  
42 way.  
43  
44  
45  
46  
47  
48

### 49 **Ethics and Dissemination**

50  
51  
52 Ethics approval was obtained from the Human Research Ethics Committee (HREC) of Edith  
53  
54 Cowan University (ID: 19827 NEWTON), with additional approval provided by the Radiation,  
55  
56 Biosafety and Hazardous Substances Committee (RBHSC). Any amendments to the protocol  
57  
58 will be submitted to and reviewed the HREC and trial registration will be updated accordingly.  
59  
60

1  
2  
3 If exercise is proven to result in favourable changes in gut microbial diversity, composition and  
4 metabolic profile, and reduce gastrointestinal complications (inflammation, constipation,  
5 diarrhoea, and nausea) in prostate cancer patients receiving ADT, this study will form the basis  
6 of a future phase III trial. These outcomes will provide further validation of exercise medicine  
7 in this population and add to efforts aimed at changing clinical practice. To reach a maximum  
8 number of clinicians, practitioners, patients and scientists, the results of this study will be  
9 published in international, high-impact peer-reviewed clinical and academic journals. In  
10 addition, outcomes will be disseminated through national and international clinical, medical or  
11 academic conferences and oncology clinic and patient meetings. Finally, EMRI and the  
12 broader study team work closely with the Prostate Cancer Foundation of Australia (PCFA),  
13 their support groups and states offices. PCFA will assist in the translation and dissemination of  
14 the research findings to community members, and cancer support groups, while study  
15 participants will receive their individual results in addition to overall study findings.  
16  
17  
18  
19  
20  
21  
22  
23  
24  
25  
26  
27  
28  
29  
30  
31  
32  
33  
34  
35  
36

## 37 **DISCUSSION**

38  
39  
40 Prostate cancer patients are burdened with persistent adverse effects of treatment, including  
41 gastrointestinal (GI) complications.<sup>7-11</sup> It has been hypothesized that the hormonal  
42 consequences of ADT may have an adverse effect on the composition of gut microbiota.<sup>20</sup>  
43 Perturbations of the composition and function of gut microbiota can cause GI complications  
44 and contribute to the development and pathogenesis of metabolism and disease processes such  
45 as inflammation, infections and disease progression.<sup>14</sup> Additionally, the metabolomic profile  
46 of prostate cancer patients could be an important biomarker for disease state and progression.<sup>33</sup>  
47 Consequently, an examination of therapeutic strategies to induce clinically meaningful  
48  
49  
50  
51  
52  
53  
54  
55  
56  
57  
58  
59  
60



1  
2  
3 improvements in the gut microbiome, metabolomic profile and inflammatory status is  
4 warranted.  
5  
6  
7  
8  
9

10 Preliminary evidence indicates that exercise, independent of diet, may result in favourable  
11 changes in gut microbial diversity and composition, which has the potential to improve overall  
12 metabolic and health profile.<sup>54</sup> While this research is promising, much of this area is in its  
13 infancy, with a substantial lack of evidence in a cancer context. Given the paucity of data,  
14 coupled with the potential negative health effects of gut dysbiosis in prostate cancer, there is a  
15 clear need to directly evaluate the relationship between exercise and gut microbiota in this  
16 patient population. The protocol outlined in this paper will evaluate the effects of exercise on  
17 changes in the composition and diversity of gut microbiota and if these changes are correlated  
18 with favourable inflammatory status, bowel function, continence, nausea and appetite among  
19 patients participating in the exercise intervention.  
20  
21  
22  
23  
24  
25  
26  
27  
28  
29  
30  
31  
32  
33  
34  
35

36 Excess adiposity is associated with a heightened inflammatory state and gut dysbiosis.<sup>55</sup>  
37 Exercise has been previously demonstrated to successfully attenuate and/or reverse the  
38 accumulation of fat mass experienced by PCa patients undergoing ADT.<sup>48 49 56</sup> Consequently,  
39 it's biologically plausible that improvements in lean body mass and overall body composition  
40 may mediate favourable changes in the composition of gut microbiota, inflammatory status,  
41 and metabolomic profile. Moreover, gut dysbiosis has been associated with frailty in older  
42 adults.<sup>57-60</sup> Though a causal relationship cannot be determined, improvements in muscle  
43 strength and physical function from exercise may contribute to improvements in the  
44 composition of gut microbiota in this population. Consequently, analysis of body composition  
45 and physical fitness will provide valuable information on any factors that may mediate changes  
46 in gut microbiome from exercise.<sup>60</sup>  
47  
48  
49  
50  
51  
52  
53  
54  
55  
56  
57  
58  
59  
60

## LIMITATIONS

Despite the novel study design, several limitations should be acknowledged. Though a dietary intervention and/or more rigorous tracking throughout the study would be interesting, limitations in funding, resources and feasibility make it difficult to do this in the current study. An interesting aspect would be to examine the differential efficacy in androgen blockade, sex hormone conversion in the patient and subsequent exercise intervention effects. However, this is not possible in the current study and thus a limitation of the investigation is the ability to link androgen kinetics directly to the primary outcomes. Additionally, although this study will be one of the first to examine changes in gut microbiota with exercise in men with ADT, the lack of follow-up precludes an analysis of the sustainability of outcomes.

## CONCLUSIONS

If demonstrated that this exercise intervention results in clinically meaningful improvements in gut health, the outcomes of this trial will provide innovative, new evidence that can inform the design of future phase III clinical trials to further elucidate the effects of exercise on gut health in patients with PCa. Further, any correlations between changes in the composition and diversity of gut microbiota and inflammatory status, and gastrointestinal issues, may inform design of future research studies that further explore these relationships.

## ACKNOWLEDGEMENTS

The authors wish to thank Dr Lydia Hearn for her assistance with preparing the manuscript, and the consumer representatives who donated their time to review the study concept and

1  
2  
3 provide input into the study protocol. The authors would also like to thank the many members  
4  
5 of the community who donate to, and volunteer for, the Prostate Cancer Foundation of  
6  
7 Australia which has funded this study.  
8  
9

## 10 11 12 13 14 **FUNDING STATEMENT**

15  
16  
17 This study is funded by Prostate Cancer Foundation Australia (PCFA), New Concepts Grant  
18  
19 scheme. NHH is supported by Cancer Council Western Australia Postdoctoral Fellowship.  
20  
21 DRT and DB are supported by Professorial Research Fellowships of Edith Cowan University.  
22  
23 CMF is supported by a NHMRC Centre of Research Excellence (Prostate Cancer Survivorship)  
24  
25 Postdoctoral Fellowship.  
26  
27  
28  
29  
30  
31

## 32 33 **CONFLICT OF INTEREST**

34  
35 The authors declare there are no conflicts of interest.  
36  
37  
38  
39  
40  
41  
42  
43

## 44 45 **CONTRIBUTION STATEMENT**

46  
47 All authors (RUN, CTC, NHH, DRT, DIB, AD, RC, CMF, CIT, NAS and DAG) contributed  
48  
49 to the design and development of the study protocol. RUN, CTC, NHH, DRT, DIB, AD, CMF  
50  
51 and DAG contributed to writing and editing of the manuscript. RC, CIT and NAS provided  
52  
53 clinical input to the editing of the manuscript and will provide patient referrals to the study. All  
54  
55 authors reviewed and approved the study protocol and have met the International Committee  
56  
57 of Medical Journal Editors (ICMJE) recommendations.  
58  
59  
60

1  
2  
3  
4  
5  
6  
7  
8  
9  
10  
11  
12  
13  
14  
15  
16  
17  
18  
19  
20  
21  
22  
23  
24  
25  
26  
27  
28  
29  
30  
31  
32  
33  
34  
35  
36  
37  
38  
39  
40  
41  
42  
43  
44  
45  
46  
47  
48  
49  
50  
51  
52  
53  
54  
55  
56  
57  
58  
59  
60

For peer review only

## LEGENDS OF FIGURES AND TABLES

Table 1. Schedule of assessments at baseline and post intervention

Figure 1. CONSORT (Consolidated Standards of Reporting Trials) diagram

For peer review only

## REFERENCES

1. Belkaid Y, Hand TW. Role of the microbiota in immunity and inflammation. *Cell* 2014;157(1):121-41. doi: 10.1016/j.cell.2014.03.011 [published Online First: 2014/04/01]
2. Marchesi JR, Adams DH, Fava F, et al. The gut microbiota and host health: a new clinical frontier. *Gut* 2016;65(2):330-9. doi: 10.1136/gutjnl-2015-309990 [published Online First: 2015/09/05]
3. Mach N, Fuster-Botella D. Endurance exercise and gut microbiota: A review. *J Sport Health Sci* 2017;6(2):179-97. doi: 10.1016/j.jshs.2016.05.001 [published Online First: 2017/06/01]
4. Sanz Y, Olivares M, Moya-Perez A, et al. Understanding the role of gut microbiome in metabolic disease risk. *Pediatr Res* 2015;77(1-2):236-44. doi: 10.1038/pr.2014.170 [published Online First: 2014/10/15]
5. Manzoor MAP, Rekha PD. Prostate cancer: Microbiome - the 'unforeseen organ'. *Nat Rev Urol* 2017;14(9):521-22. doi: 10.1038/nrurol.2017.97 [published Online First: 2017/06/28]
6. Rhee H, Gunter JH, Heathcote P, et al. Adverse effects of androgen-deprivation therapy in prostate cancer and their management. *BJU Int* 2015;115 Suppl 5:3-13. doi: 10.1111/bju.12964 [published Online First: 2014/10/21]
7. Potosky AL, Davis WW, Hoffman RM, et al. Five-year outcomes after prostatectomy or radiotherapy for prostate cancer: the prostate cancer outcomes study. *J Natl Cancer Inst* 2004;96(18):1358-67. doi: 10.1093/jnci/djh259 [published Online First: 2004/09/16]
8. Sanda MG, Dunn RL, Michalski J, et al. Quality of life and satisfaction with outcome among prostate-cancer survivors. *N Engl J Med* 2008;358(12):1250-61. doi: 10.1056/NEJMoa074311 [published Online First: 2008/03/21]
9. Stensvold A, Dahl AA, Brennhovd B, et al. Bother problems in prostate cancer patients after curative treatment. *Urol Oncol* 2013;31(7):1067-78. doi: 10.1016/j.urolonc.2011.12.020 [published Online First: 2012/02/22]
10. King MT, Viney R, Smith DP, et al. Survival gains needed to offset persistent adverse treatment effects in localised prostate cancer. *Br J Cancer* 2012;106(4):638-45. doi: 10.1038/bjc.2011.552 [published Online First: 2012/01/26]
11. Maeda Y, Hoyer M, Lundby L, et al. Faecal incontinence following radiotherapy for prostate cancer: a systematic review. *Radiother Oncol* 2011;98(2):145-53. doi: 10.1016/j.radonc.2010.12.004 [published Online First: 2011/01/25]
12. Fruge AD, Ptacek T, Tsuruta Y, et al. Dietary Changes Impact the Gut Microbe Composition in Overweight and Obese Men with Prostate Cancer Undergoing Radical Prostatectomy. *J Acad Nutr Diet* 2018;118(4):714-23 e1. doi: 10.1016/j.jand.2016.10.017 [published Online First: 2016/12/19]
13. Amirian ES, Petrosino JF, Ajami NJ, et al. Potential role of gastrointestinal microbiota composition in prostate cancer risk. *Infect Agent Cancer* 2013;8(1):42. doi: 10.1186/1750-9378-8-42 [published Online First: 2013/11/05]
14. Golombos DM, Ayangbesan A, O'Malley P, et al. The Role of Gut Microbiome in the Pathogenesis of Prostate Cancer: A Prospective, Pilot Study. *Urology* 2018;111:122-28. doi: 10.1016/j.urology.2017.08.039 [published Online First: 2017/09/11]
15. Cavalieri E, Rogan E. The molecular etiology and prevention of estrogen-initiated cancers: Ockham's Razor: Pluralitas non est ponenda sine necessitate. Plurality should not be posited without necessity. *Mol Aspects Med* 2014;36:1-55. doi: 10.1016/j.mam.2013.08.002 [published Online First: 2013/09/03]
16. Harada N, Hanaoka R, Hanada K, et al. Hypogonadism alters cecal and fecal microbiota in male mice. *Gut Microbes* 2016;7(6):533-39. doi: 10.1080/19490976.2016.1239680 [published Online First: 2016/11/03]
17. Harada N, Hanaoka R, Horiuchi H, et al. Castration influences intestinal microflora and induces abdominal obesity in high-fat diet-fed mice. *Sci Rep* 2016;6:23001. doi: 10.1038/srep23001 [published Online First: 2016/03/11]

18. Org E, Mehrabian M, Parks BW, et al. Sex differences and hormonal effects on gut microbiota composition in mice. *Gut Microbes* 2016;7(4):313-22. doi: 10.1080/19490976.2016.1203502 [published Online First: 2016/06/30]
19. Markle JG, Frank DN, Mortin-Toth S, et al. Sex differences in the gut microbiome drive hormone-dependent regulation of autoimmunity. *Science* 2013;339(6123):1084-8. doi: 10.1126/science.1233521 [published Online First: 2013/01/19]
20. Klil-Drori AJ, Tascilar K, Yin H, et al. Androgen Deprivation Therapy and the Incidence of Inflammatory Bowel Disease in Patients With Prostate Cancer. *Am J Epidemiol* 2016;184(1):15-22. doi: 10.1093/aje/kwv307 [published Online First: 2016/06/09]
21. Bressa C, Bailen-Andrino M, Perez-Santiago J, et al. Differences in gut microbiota profile between women with active lifestyle and sedentary women. *PLoS One* 2017;12(2):e0171352. doi: 10.1371/journal.pone.0171352 [published Online First: 2017/02/12]
22. Flint HJ, Duncan SH, Scott KP, et al. Links between diet, gut microbiota composition and gut metabolism. *Proc Nutr Soc* 2015;74(1):13-22. doi: 10.1017/S0029665114001463 [published Online First: 2014/10/01]
23. Cerda B, Perez M, Perez-Santiago JD, et al. Gut Microbiota Modification: Another Piece in the Puzzle of the Benefits of Physical Exercise in Health? *Front Physiol* 2016;7:51. doi: 10.3389/fphys.2016.00051 [published Online First: 2016/03/01]
24. Choi Y, Oh DY, Kim TY, et al. Skeletal Muscle Depletion Predicts the Prognosis of Patients with Advanced Pancreatic Cancer Undergoing Palliative Chemotherapy, Independent of Body Mass Index. *PLoS One* 2015;10(10):e0139749. doi: 10.1371/journal.pone.0139749 [published Online First: 2015/10/06]
25. Petriz BA, Castro AP, Almeida JA, et al. Exercise induction of gut microbiota modifications in obese, non-obese and hypertensive rats. *BMC Genomics* 2014;15:511. doi: 10.1186/1471-2164-15-511 [published Online First: 2014/06/24]
26. Mariat D, Firmesse O, Levenez F, et al. The Firmicutes/Bacteroidetes ratio of the human microbiota changes with age. *BMC Microbiol* 2009;9:123. doi: 10.1186/1471-2180-9-123 [published Online First: 2009/06/11]
27. Ley RE, Turnbaugh PJ, Klein S, et al. Microbial ecology: human gut microbes associated with obesity. *Nature* 2006;444(7122):1022-3. doi: 10.1038/4441022a [published Online First: 2006/12/22]
28. Smith MR, Finkelstein JS, McGovern FJ, et al. Changes in body composition during androgen deprivation therapy for prostate cancer. *J Clin Endocrinol Metab* 2002;87(2):599-603. doi: 10.1210/jcem.87.2.8299 [published Online First: 2002/02/12]
29. Galvao DA, Spry NA, Taaffe DR, et al. Changes in muscle, fat and bone mass after 36 weeks of maximal androgen blockade for prostate cancer. *BJU Int* 2008;102(1):44-7. doi: 10.1111/j.1464-410X.2008.07539.x [published Online First: 2008/03/14]
30. Boxer RS, Kenny AM, Dowsett R, et al. The effect of 6 months of androgen deprivation therapy on muscle and fat mass in older men with localized prostate cancer. *Aging Male* 2005;8(3-4):207-12. doi: 10.1080/13685530500361226 [published Online First: 2006/01/05]
31. Clemente JC, Ursell LK, Parfrey LW, et al. The impact of the gut microbiota on human health: an integrative view. *Cell* 2012;148(6):1258-70. doi: 10.1016/j.cell.2012.01.035 [published Online First: 2012/03/20]
32. Villena J, Kitazawa H. Modulation of Intestinal TLR4-Inflammatory Signaling Pathways by Probiotic Microorganisms: Lessons Learned from *Lactobacillus jensenii* TL2937. *Front Immunol* 2014;4:512. doi: 10.3389/fimmu.2013.00512 [published Online First: 2014/01/25]
33. Kelly RS, Vander Heiden MG, Giovannucci E, et al. Metabolomic Biomarkers of Prostate Cancer: Prediction, Diagnosis, Progression, Prognosis, and Recurrence. *Cancer Epidemiol Biomarkers Prev* 2016;25(6):887-906. doi: 10.1158/1055-9965.EPI-15-1223 [published Online First: 2016/05/20]



- 1
- 2
- 3
- 4 34. Paulsen JA, Ptacek TS, Carter SJ, et al. Gut microbiota composition associated with alterations in
- 5 cardiorespiratory fitness and psychosocial outcomes among breast cancer survivors. *Support*
- 6 *Care Cancer* 2017;25(5):1563-70. doi: 10.1007/s00520-016-3568-5 [published Online First:
- 7 2017/01/09]
- 8 35. Chang AJ, Autio KA, Roach M, 3rd, et al. High-risk prostate cancer-classification and therapy. *Nat*
- 9 *Rev Clin Oncol* 2014;11(6):308-23. doi: 10.1038/nrclinonc.2014.68 [published Online First:
- 10 2014/05/21]
- 11 36. Choo JM, Leong LE, Rogers GB. Sample storage conditions significantly influence faecal
- 12 microbiome profiles. *Sci Rep* 2015;5:16350. doi: 10.1038/srep16350 [published Online First:
- 13 2015/11/18]
- 14 37. Al-Ghalith GA, Hillmann B, Ang K, et al. SHI7 Is a Self-Learning Pipeline for Multipurpose Short-
- 15 Read DNA Quality Control. *mSystems* 2018;3(3) doi: 10.1128/mSystems.00202-17 [published
- 16 Online First: 2018/05/03]
- 17 38. M M. Cutadapt Removes Adapter Sequences From High-Throughput Sequencing Reads.
- 18 *EMBnetjournal* 2011;17:10-12.
- 19 39. Callahan BJ, McMurdie PJ, Rosen MJ, et al. DADA2: High-resolution sample inference from
- 20 Illumina amplicon data. *Nat Methods* 2016;13(7):581-3. doi: 10.1038/nmeth.3869 [published
- 21 Online First: 2016/05/24]
- 22 40. Cole JR, Wang Q, Fish JA, et al. Ribosomal Database Project: data and tools for high throughput
- 23 rRNA analysis. *Nucleic Acids Res* 2014;42(Database issue):D633-42. doi:
- 24 10.1093/nar/gkt1244 [published Online First: 2013/11/30]
- 25 41. Roseth AG, Fagerhol MK, Aadland E, et al. Assessment of the neutrophil dominating protein
- 26 calprotectin in feces. A methodologic study. *Scand J Gastroenterol* 1992;27(9):793-8.
- 27 [published Online First: 1992/09/01]
- 28 42. Talley NJ, Boyce PM, Owen BK, et al. Initial validation of a bowel symptom questionnaire and
- 29 measurement of chronic gastrointestinal symptoms in Australians. *Aust N Z J Med*
- 30 1995;25(4):302-8. [published Online First: 1995/08/01]
- 31 43. Kulich KR, Madisch A, Pacini F, et al. Reliability and validity of the Gastrointestinal Symptom
- 32 Rating Scale (GSRS) and Quality of Life in Reflux and Dyspepsia (QOLRAD) questionnaire in
- 33 dyspepsia: a six-country study. *Health Qual Life Outcomes* 2008;6:12. doi: 10.1186/1477-
- 34 7525-6-12 [published Online First: 2008/02/02]
- 35 44. Blake MR, Raker JM, Whelan K. Validity and reliability of the Bristol Stool Form Scale in healthy
- 36 adults and patients with diarrhoea-predominant irritable bowel syndrome. *Aliment*
- 37 *Pharmacol Ther* 2016;44(7):693-703. doi: 10.1111/apt.13746 [published Online First:
- 38 2016/08/06]
- 39 45. Kato J, Nagahara A, Iijima K, et al. Evaluation of EORTC QLQ-C30 questionnaire in patients
- 40 undergoing in-hospital chemotherapy for gastrointestinal cancer in Japan. *J Gastroenterol*
- 41 *Hepatol* 2008;23 Suppl 2:S268-72. doi: 10.1111/j.1440-1746.2008.05414.x [published Online
- 42 First: 2009/01/16]
- 43 46. van Andel G, Bottomley A, Fossa SD, et al. An international field study of the EORTC QLQ-PR25: a
- 44 questionnaire for assessing the health-related quality of life of patients with prostate cancer.
- 45 *Eur J Cancer* 2008;44(16):2418-24. doi: 10.1016/j.ejca.2008.07.030 [published Online First:
- 46 2008/09/09]
- 47 47. Hart NH, Nimphius S, Spiteri T, et al. Segmental Musculoskeletal Examinations using Dual-Energy
- 48 X-Ray Absorptiometry (DXA): Positioning and Analysis Considerations. *J Sports Sci Med*
- 49 2015;14(3):620-6. [published Online First: 2015/09/04]
- 50 48. Galvao DA, Spry N, Denham J, et al. A multicentre year-long randomised controlled trial of
- 51 exercise training targeting physical functioning in men with prostate cancer previously
- 52 treated with androgen suppression and radiation from TROG 03.04 RADAR. *Eur Urol*
- 53 2014;65(5):856-64. doi: 10.1016/j.eururo.2013.09.041 [published Online First: 2013/10/12]
- 54
- 55
- 56
- 57
- 58
- 59
- 60



- 1
- 2
- 3
- 4 49. Galvao DA, Taaffe DR, Cormie P, et al. Efficacy and safety of a modular multi-modal exercise
- 5 program in prostate cancer patients with bone metastases: a randomized controlled trial.
- 6 *BMC Cancer* 2011;11:517. doi: 10.1186/1471-2407-11-517 [published Online First:
- 7 2011/12/15]
- 8 50. Garnacho-Castano MV, Dominguez R, Munoz Gonzalez A, et al. Exercise Prescription Using the
- 9 Borg Rating of Perceived Exertion to Improve Fitness. *Int J Sports Med* 2018;39(2):115-23.
- 10 doi: 10.1055/s-0043-120761 [published Online First: 2017/12/01]
- 11 51. Reinke SN, Galindo-Prieto B, Skotare T, et al. OnPLS-Based Multi-Block Data Integration: A
- 12 Multivariate Approach to Interrogating Biological Interactions in Asthma. *Anal Chem*
- 13 2018;90(22):13400-08. doi: 10.1021/acs.analchem.8b03205 [published Online First:
- 14 2018/10/20]
- 15 52. De Roover K, Ceulemans E, Timmerman ME. How to perform multiblock component analysis in
- 16 practice. *Behav Res Methods* 2012;44(1):41-56. doi: 10.3758/s13428-011-0129-1 [published
- 17 Online First: 2011/07/13]
- 18 53. Tenenhaus M, Tenenhaus A, Groenen PJF. Regularized Generalized Canonical Correlation
- 19 Analysis: A Framework for Sequential Multiblock Component Methods. *Psychometrika* 2017
- 20 doi: 10.1007/s11336-017-9573-x [published Online First: 2017/05/26]
- 21 54. Allen JM, Mailing LJ, Cohrs J, et al. Exercise training-induced modification of the gut microbiota
- 22 persists after microbiota colonization and attenuates the response to chemically-induced
- 23 colitis in gnotobiotic mice. *Gut Microbes* 2018;9(2):115-30. doi:
- 24 10.1080/19490976.2017.1372077 [published Online First: 2017/09/02]
- 25 55. Harley IT, Karp CL. Obesity and the gut microbiome: Striving for causality. *Mol Metab* 2012;1(1-
- 26 2):21-31. doi: 10.1016/j.molmet.2012.07.002 [published Online First: 2012/01/01]
- 27 56. Focht BC, Lucas AR, Grainger E, et al. Effects of a Group-Mediated Exercise and Dietary
- 28 Intervention in the Treatment of Prostate Cancer Patients Undergoing Androgen Deprivation
- 29 Therapy: Results From the IDEA-P Trial. *Ann Behav Med* 2018;52(5):412-28. doi:
- 30 10.1093/abm/kax002 [published Online First: 2018/04/24]
- 31 57. Grosicki GJ, Fielding RA, Lustgarten MS. Gut Microbiota Contribute to Age-Related Changes in
- 32 Skeletal Muscle Size, Composition, and Function: Biological Basis for a Gut-Muscle Axis.
- 33 *Calcif Tissue Int* 2018;102(4):433-42. doi: 10.1007/s00223-017-0345-5 [published Online
- 34 First: 2017/10/24]
- 35 58. Claesson MJ, Jeffery IB, Conde S, et al. Gut microbiota composition correlates with diet and
- 36 health in the elderly. *Nature* 2012;488(7410):178-84. doi: 10.1038/nature11319 [published
- 37 Online First: 2012/07/17]
- 38 59. van Tongeren SP, Slaets JP, Harmsen HJ, et al. Fecal microbiota composition and frailty. *Appl*
- 39 *Environ Microbiol* 2005;71(10):6438-42. doi: 10.1128/AEM.71.10.6438-6442.2005 [published
- 40 Online First: 2005/10/06]
- 41 60. Costamagna D, Costelli P, Sampaolesi M, et al. Role of Inflammation in Muscle Homeostasis and
- 42 Myogenesis. *Mediators Inflamm* 2015;2015:805172. doi: 10.1155/2015/805172 [published
- 43 Online First: 2015/10/29]
- 44
- 45
- 46
- 47
- 48
- 49
- 50
- 51
- 52
- 53
- 54
- 55
- 56
- 57
- 58
- 59
- 60

1  
2  
3  
4  
5  
6  
7  
8  
9  
10  
11  
12  
13  
14  
15  
16  
17  
18  
19  
20  
21  
22  
23  
24  
25  
26  
27  
28  
29  
30  
31  
32  
33  
34  
35  
36  
37  
38  
39  
40  
41  
42  
43  
44  
45  
46  
47  
48  
49  
50  
51  
52  
53  
54  
55  
56  
57  
58  
59  
60

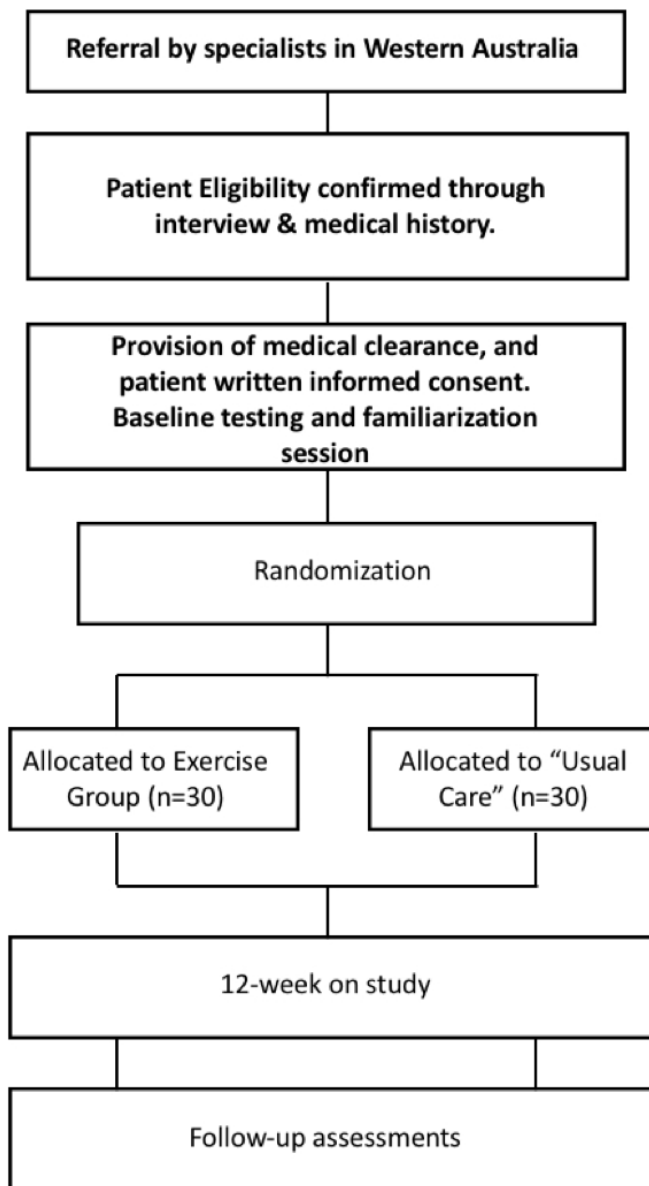

Figure 1. CONSORT (Consolidated Standards of Reporting Trials) diagram

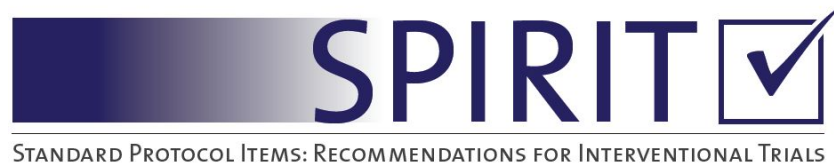

SPIRIT 2013 Checklist: Recommended items to address in a clinical trial protocol and related documents\*

| Section/item                      | ItemNo | Description                                                                                                                                                                                                                                                                              | Addressed on page number  |
|-----------------------------------|--------|------------------------------------------------------------------------------------------------------------------------------------------------------------------------------------------------------------------------------------------------------------------------------------------|---------------------------|
| <b>Administrative information</b> |        |                                                                                                                                                                                                                                                                                          |                           |
| Title                             | 1      | Descriptive title identifying the study design, population, interventions, and, if applicable, trial acronym                                                                                                                                                                             | 1                         |
| Trial registration                | 2a     | Trial identifier and registry name. If not yet registered, name of intended registry                                                                                                                                                                                                     | 2                         |
|                                   | 2b     | All items from the World Health Organization Trial Registration Data Set                                                                                                                                                                                                                 | Yes,<br>www.anzctr.org.au |
| Protocol version                  | 3      | Date and version identifier                                                                                                                                                                                                                                                              | 1                         |
| Funding                           | 4      | Sources and types of financial, material, and other support                                                                                                                                                                                                                              | 19                        |
| Roles and responsibilities        | 5a     | Names, affiliations, and roles of protocol contributors                                                                                                                                                                                                                                  | 1 & 19                    |
|                                   | 5b     | Name and contact information for the trial sponsor                                                                                                                                                                                                                                       | 19                        |
|                                   | 5c     | Role of study sponsor and funders, if any, in study design; collection, management, analysis, and interpretation of data; writing of the report; and the decision to submit the report for publication, including whether they will have ultimate authority over any of these activities | 18 & 19                   |

1  
2  
3  
4  
5  
6  
7  
8  
9  
10  
11  
12  
13  
14  
15  
16  
17  
18  
19  
20  
21  
22  
23  
24  
25  
26  
27  
28  
29  
30  
31  
32  
33  
34  
35  
36  
37  
38  
39  
40  
41  
42  
43  
44  
45  
46

|  |    |                                                                                                                                                                                                                                                                  |         |
|--|----|------------------------------------------------------------------------------------------------------------------------------------------------------------------------------------------------------------------------------------------------------------------|---------|
|  | 5d | Composition, roles, and responsibilities of the coordinating centre, steering committee, endpoint adjudication committee, data management team, and other individuals or groups overseeing the trial, if applicable (see Item 21a for data monitoring committee) | 18 & 19 |
|--|----|------------------------------------------------------------------------------------------------------------------------------------------------------------------------------------------------------------------------------------------------------------------|---------|

**Introduction**

|                          |    |                                                                                                                                                                                                           |     |
|--------------------------|----|-----------------------------------------------------------------------------------------------------------------------------------------------------------------------------------------------------------|-----|
| Background and rationale | 6a | Description of research question and justification for undertaking the trial, including summary of relevant studies (published and unpublished) examining benefits and harms for each intervention        | 4-6 |
|                          | 6b | Explanation for choice of comparators                                                                                                                                                                     | 6   |
| Objectives               | 7  | Specific objectives or hypotheses                                                                                                                                                                         | 6   |
| Trial design             | 8  | Description of trial design including type of trial (eg, parallel group, crossover, factorial, single group), allocation ratio, and framework (eg, superiority, equivalence, noninferiority, exploratory) | 6   |

**Methods: Participants, interventions, and outcomes**

|                      |     |                                                                                                                                                                                                |         |
|----------------------|-----|------------------------------------------------------------------------------------------------------------------------------------------------------------------------------------------------|---------|
| Study setting        | 9   | Description of study settings (eg, community clinic, academic hospital) and list of countries where data will be collected. Reference to where list of study sites can be obtained             | 13 & 14 |
| Eligibility criteria | 10  | Inclusion and exclusion criteria for participants. If applicable, eligibility criteria for study centres and individuals who will perform the interventions (eg, surgeons, psychotherapists)   | 6 & 7   |
| Interventions        | 11a | Interventions for each group with sufficient detail to allow replication, including how and when they will be administered                                                                     | 13 & 14 |
|                      | 11b | Criteria for discontinuing or modifying allocated interventions for a given trial participant (eg, drug dose change in response to harms, participant request, or improving/worsening disease) | n/a     |

|    |                      |     |                                                                                                                                                                                                                                                                                                                                                                                |         |
|----|----------------------|-----|--------------------------------------------------------------------------------------------------------------------------------------------------------------------------------------------------------------------------------------------------------------------------------------------------------------------------------------------------------------------------------|---------|
| 1  |                      |     |                                                                                                                                                                                                                                                                                                                                                                                |         |
| 2  |                      |     |                                                                                                                                                                                                                                                                                                                                                                                |         |
| 3  |                      |     |                                                                                                                                                                                                                                                                                                                                                                                |         |
| 4  |                      | 11c | Strategies to improve adherence to intervention protocols, and any procedures for monitoring adherence (eg, drug tablet return, laboratory tests)                                                                                                                                                                                                                              | 13 & 14 |
| 5  |                      |     |                                                                                                                                                                                                                                                                                                                                                                                |         |
| 6  |                      |     |                                                                                                                                                                                                                                                                                                                                                                                |         |
| 7  |                      | 11d | Relevant concomitant care and interventions that are permitted or prohibited during the trial                                                                                                                                                                                                                                                                                  | n/a     |
| 8  |                      |     |                                                                                                                                                                                                                                                                                                                                                                                |         |
| 9  | Outcomes             | 12  | Primary, secondary, and other outcomes, including the specific measurement variable (eg, systolic blood pressure), analysis metric (eg, change from baseline, final value, time to event), method of aggregation (eg, median, proportion), and time point for each outcome. Explanation of the clinical relevance of chosen efficacy and harm outcomes is strongly recommended | 10-13   |
| 10 |                      |     |                                                                                                                                                                                                                                                                                                                                                                                |         |
| 11 |                      |     |                                                                                                                                                                                                                                                                                                                                                                                |         |
| 12 |                      |     |                                                                                                                                                                                                                                                                                                                                                                                |         |
| 13 |                      |     |                                                                                                                                                                                                                                                                                                                                                                                |         |
| 14 | Participant timeline | 13  | Time schedule of enrolment, interventions (including any run-ins and washouts), assessments, and visits for participants. A schematic diagram is highly recommended (see Figure)                                                                                                                                                                                               | 20      |
| 15 |                      |     |                                                                                                                                                                                                                                                                                                                                                                                |         |
| 16 | Sample size          | 14  | Estimated number of participants needed to achieve study objectives and how it was determined, including clinical and statistical assumptions supporting any sample size calculations                                                                                                                                                                                          | 14      |
| 17 |                      |     |                                                                                                                                                                                                                                                                                                                                                                                |         |
| 18 |                      |     |                                                                                                                                                                                                                                                                                                                                                                                |         |
| 19 |                      |     |                                                                                                                                                                                                                                                                                                                                                                                |         |
| 20 |                      |     |                                                                                                                                                                                                                                                                                                                                                                                |         |
| 21 |                      |     |                                                                                                                                                                                                                                                                                                                                                                                |         |
| 22 | Recruitment          | 15  | Strategies for achieving adequate participant enrolment to reach target sample size                                                                                                                                                                                                                                                                                            | 7 & 8   |
| 23 |                      |     |                                                                                                                                                                                                                                                                                                                                                                                |         |

#### Methods: Assignment of interventions (for controlled trials)

##### Allocation:

|    |                                  |     |                                                                                                                                                                                                                                                                                                                                                          |   |
|----|----------------------------------|-----|----------------------------------------------------------------------------------------------------------------------------------------------------------------------------------------------------------------------------------------------------------------------------------------------------------------------------------------------------------|---|
| 24 |                                  |     |                                                                                                                                                                                                                                                                                                                                                          |   |
| 25 |                                  |     |                                                                                                                                                                                                                                                                                                                                                          |   |
| 26 |                                  |     |                                                                                                                                                                                                                                                                                                                                                          |   |
| 27 |                                  |     |                                                                                                                                                                                                                                                                                                                                                          |   |
| 28 | Sequence generation              | 16a | Method of generating the allocation sequence (eg, computer-generated random numbers), and list of any factors for stratification. To reduce predictability of a random sequence, details of any planned restriction (eg, blocking) should be provided in a separate document that is unavailable to those who enrol participants or assign interventions | 8 |
| 29 |                                  |     |                                                                                                                                                                                                                                                                                                                                                          |   |
| 30 |                                  |     |                                                                                                                                                                                                                                                                                                                                                          |   |
| 31 |                                  |     |                                                                                                                                                                                                                                                                                                                                                          |   |
| 32 |                                  |     |                                                                                                                                                                                                                                                                                                                                                          |   |
| 33 |                                  |     |                                                                                                                                                                                                                                                                                                                                                          |   |
| 34 | Allocation concealment mechanism | 16b | Mechanism of implementing the allocation sequence (eg, central telephone; sequentially numbered, opaque, sealed envelopes), describing any steps to conceal the sequence until interventions are assigned                                                                                                                                                | 8 |
| 35 |                                  |     |                                                                                                                                                                                                                                                                                                                                                          |   |
| 36 |                                  |     |                                                                                                                                                                                                                                                                                                                                                          |   |
| 37 |                                  |     |                                                                                                                                                                                                                                                                                                                                                          |   |
| 38 |                                  |     |                                                                                                                                                                                                                                                                                                                                                          |   |
| 39 |                                  |     |                                                                                                                                                                                                                                                                                                                                                          |   |
| 40 |                                  |     |                                                                                                                                                                                                                                                                                                                                                          |   |
| 41 |                                  |     |                                                                                                                                                                                                                                                                                                                                                          |   |
| 42 |                                  |     |                                                                                                                                                                                                                                                                                                                                                          |   |

1  
2  
3  
4  
5  
6  
7  
8  
9  
10  
11  
12  
13  
14  
15  
16  
17  
18  
19  
20  
21  
22  
23  
24  
25  
26  
27  
28  
29  
30  
31  
32  
33  
34  
35  
36  
37  
38  
39  
40  
41  
42  
43  
44  
45  
46

Implementation 16c Who will generate the allocation sequence, who will enrol participants, and who will assign participants to interventions 8

Blinding (masking) 17a Who will be blinded after assignment to interventions (eg, trial participants, care providers, outcome assessors, data analysts), and how 8

17b If blinded, circumstances under which unblinding is permissible, and procedure for revealing a participant’s allocated intervention during the trial n/a

**Methods: Data collection, management, and analysis**

Data collection methods 18a Plans for assessment and collection of outcome, baseline, and other trial data, including any related processes to promote data quality (eg, duplicate measurements, training of assessors) and a description of study instruments (eg, questionnaires, laboratory tests) along with their reliability and validity, if known. Reference to where data collection forms can be found, if not in the protocol 8-14

18b Plans to promote participant retention and complete follow-up, including list of any outcome data to be collected for participants who discontinue or deviate from intervention protocols 14 & 15

Data management 19 Plans for data entry, coding, security, and storage, including any related processes to promote data quality (eg, double data entry; range checks for data values). Reference to where details of data management procedures can be found, if not in the protocol 15

Statistical methods 20a Statistical methods for analysing primary and secondary outcomes. Reference to where other details of the statistical analysis plan can be found, if not in the protocol 14 & 15

20b Methods for any additional analyses (eg, subgroup and adjusted analyses) 14 & 15

20c Definition of analysis population relating to protocol non-adherence (eg, as randomised analysis), and any statistical methods to handle missing data (eg, multiple imputation) 15

**Methods: Monitoring**

|    |                                 |     |                                                                                                                                                                                                                                                                                                                                       |         |
|----|---------------------------------|-----|---------------------------------------------------------------------------------------------------------------------------------------------------------------------------------------------------------------------------------------------------------------------------------------------------------------------------------------|---------|
| 1  |                                 |     |                                                                                                                                                                                                                                                                                                                                       |         |
| 2  |                                 |     |                                                                                                                                                                                                                                                                                                                                       |         |
| 3  |                                 |     |                                                                                                                                                                                                                                                                                                                                       |         |
| 4  | Data monitoring                 | 21a | Composition of data monitoring committee (DMC); summary of its role and reporting structure; statement of whether it is independent from the sponsor and competing interests; and reference to where further details about its charter can be found, if not in the protocol. Alternatively, an explanation of why a DMC is not needed | 15 & 16 |
| 5  |                                 |     |                                                                                                                                                                                                                                                                                                                                       |         |
| 6  |                                 |     |                                                                                                                                                                                                                                                                                                                                       |         |
| 7  |                                 |     |                                                                                                                                                                                                                                                                                                                                       |         |
| 8  |                                 |     |                                                                                                                                                                                                                                                                                                                                       |         |
| 9  |                                 | 21b | Description of any interim analyses and stopping guidelines, including who will have access to these interim results and make the final decision to terminate the trial                                                                                                                                                               | n/a     |
| 10 |                                 |     |                                                                                                                                                                                                                                                                                                                                       |         |
| 11 |                                 |     |                                                                                                                                                                                                                                                                                                                                       |         |
| 12 | Harms                           | 22  | Plans for collecting, assessing, reporting, and managing solicited and spontaneously reported adverse events and other unintended effects of trial interventions or trial conduct                                                                                                                                                     | 15 & 16 |
| 13 |                                 |     |                                                                                                                                                                                                                                                                                                                                       |         |
| 14 |                                 |     |                                                                                                                                                                                                                                                                                                                                       |         |
| 15 | Auditing                        | 23  | Frequency and procedures for auditing trial conduct, if any, and whether the process will be independent from investigators and the sponsor                                                                                                                                                                                           |         |
| 16 |                                 |     |                                                                                                                                                                                                                                                                                                                                       |         |
| 17 |                                 |     |                                                                                                                                                                                                                                                                                                                                       |         |
| 18 |                                 |     |                                                                                                                                                                                                                                                                                                                                       |         |
| 19 | <b>Ethics and dissemination</b> |     |                                                                                                                                                                                                                                                                                                                                       |         |
| 20 |                                 |     |                                                                                                                                                                                                                                                                                                                                       |         |
| 21 | Research ethics approval        | 24  | Plans for seeking research ethics committee/institutional review board (REC/IRB) approval                                                                                                                                                                                                                                             | 2 & 16  |
| 22 |                                 |     |                                                                                                                                                                                                                                                                                                                                       |         |
| 23 |                                 |     |                                                                                                                                                                                                                                                                                                                                       |         |
| 24 | Protocol amendments             | 25  | Plans for communicating important protocol modifications (eg, changes to eligibility criteria, outcomes, analyses) to relevant parties (eg, investigators, REC/IRBs, trial participants, trial registries, journals, regulators)                                                                                                      | 16      |
| 25 |                                 |     |                                                                                                                                                                                                                                                                                                                                       |         |
| 26 |                                 |     |                                                                                                                                                                                                                                                                                                                                       |         |
| 27 |                                 |     |                                                                                                                                                                                                                                                                                                                                       |         |
| 28 |                                 |     |                                                                                                                                                                                                                                                                                                                                       |         |
| 29 | Consent or assent               | 26a | Who will obtain informed consent or assent from potential trial participants or authorised surrogates, and how (see Item 32)                                                                                                                                                                                                          | 7       |
| 30 |                                 |     |                                                                                                                                                                                                                                                                                                                                       |         |
| 31 |                                 |     |                                                                                                                                                                                                                                                                                                                                       |         |
| 32 |                                 | 26b | Additional consent provisions for collection and use of participant data and biological specimens in ancillary studies, if applicable                                                                                                                                                                                                 | 7       |
| 33 |                                 |     |                                                                                                                                                                                                                                                                                                                                       |         |
| 34 |                                 |     |                                                                                                                                                                                                                                                                                                                                       |         |
| 35 | Confidentiality                 | 27  | How personal information about potential and enrolled participants will be collected, shared, and maintained in order to protect confidentiality before, during, and after the trial                                                                                                                                                  | 15      |
| 36 |                                 |     |                                                                                                                                                                                                                                                                                                                                       |         |
| 37 |                                 |     |                                                                                                                                                                                                                                                                                                                                       |         |
| 38 |                                 |     |                                                                                                                                                                                                                                                                                                                                       |         |
| 39 |                                 |     |                                                                                                                                                                                                                                                                                                                                       |         |
| 40 |                                 |     |                                                                                                                                                                                                                                                                                                                                       |         |
| 41 |                                 |     |                                                                                                                                                                                                                                                                                                                                       |         |
| 42 |                                 |     |                                                                                                                                                                                                                                                                                                                                       |         |
| 43 |                                 |     |                                                                                                                                                                                                                                                                                                                                       |         |
| 44 |                                 |     |                                                                                                                                                                                                                                                                                                                                       |         |
| 45 |                                 |     |                                                                                                                                                                                                                                                                                                                                       |         |
| 46 |                                 |     |                                                                                                                                                                                                                                                                                                                                       |         |

1  
2  
3  
4  
5  
6  
7  
8  
9  
10  
11  
12  
13  
14  
15  
16  
17  
18  
19  
20  
21  
22  
23  
24  
25  
26  
27  
28  
29  
30  
31  
32  
33  
34  
35  
36  
37  
38  
39  
40  
41  
42  
43  
44  
45  
46

|                               |     |                                                                                                                                                                                                                                                                                     |                      |
|-------------------------------|-----|-------------------------------------------------------------------------------------------------------------------------------------------------------------------------------------------------------------------------------------------------------------------------------------|----------------------|
| Declaration of interests      | 28  | Financial and other competing interests for principal investigators for the overall trial and each study site                                                                                                                                                                       | 19 & 20              |
| Access to data                | 29  | Statement of who will have access to the final trial dataset, and disclosure of contractual agreements that limit such access for investigators                                                                                                                                     | 15                   |
| Ancillary and post-trial care | 30  | Provisions, if any, for ancillary and post-trial care, and for compensation to those who suffer harm from trial participation                                                                                                                                                       | n/a                  |
| Dissemination policy          | 31a | Plans for investigators and sponsor to communicate trial results to participants, healthcare professionals, the public, and other relevant groups (eg, via publication, reporting in results databases, or other data sharing arrangements), including any publication restrictions | 15 & 16              |
|                               | 31b | Authorship eligibility guidelines and any intended use of professional writers                                                                                                                                                                                                      | 15 & 16              |
|                               | 31c | Plans, if any, for granting public access to the full protocol, participant-level dataset, and statistical code                                                                                                                                                                     | 16                   |
| <b>Appendices</b>             |     |                                                                                                                                                                                                                                                                                     |                      |
| Informed consent materials    | 32  | Model consent form and other related documentation given to participants and authorised surrogates                                                                                                                                                                                  | Available on request |
| Biological specimens          | 33  | Plans for collection, laboratory evaluation, and storage of biological specimens for genetic or molecular analysis in the current trial and for future use in ancillary studies, if applicable                                                                                      | 11                   |

---

\*It is strongly recommended that this checklist be read in conjunction with the SPIRIT 2013 Explanation & Elaboration for important clarification on the items. Amendments to the protocol should be tracked and dated. The SPIRIT checklist is copyrighted by the SPIRIT Group under the Creative Commons "[Attribution-NonCommercial-NoDerivs 3.0 Unported](https://creativecommons.org/licenses/by-nc-nd/3.0/)" license.
